1 **Axon-like protrusions promote small cell lung cancer migration and**  
2 **metastasis**

3 Dian Yang<sup>1,2,3</sup>, Fangfei Qu<sup>2,3</sup>, Hongchen Cai<sup>3</sup>, Chen-Hua Chuang<sup>3</sup>, Jing Shan Lim<sup>1,2,3</sup>, Nadine  
4 Jahchan<sup>2,3</sup>, Barbara M. Grüner<sup>3,4,6,7</sup>, Christina Kong<sup>4</sup>, Madeleine J. Oudin<sup>5</sup>, Monte M.  
5 Winslow<sup>1,3,4\*</sup> and Julien Sage<sup>1,2,3\*</sup>

6 <sup>1</sup> Cancer Biology Program, Stanford University School of Medicine, Stanford, CA 94305, USA.

7 <sup>2</sup> Department of Pediatrics, Stanford University School of Medicine, Stanford, CA 94305, USA.

8 <sup>3</sup> Department of Genetics, Stanford University School of Medicine, Stanford, CA 94305, USA.

9 <sup>4</sup> Department of Pathology, Stanford University School of Medicine, Stanford, CA 94305, USA.

10 <sup>5</sup> Department of Biomedical Engineering, Tufts University, Medford, MA 02155, USA.

11 <sup>6</sup> Department of Medical Oncology, West German Cancer Center, University Hospital Essen, Germany.

12 <sup>7</sup> German Cancer Consortium (DKTK) partner site Essen, Germany.

13 \* Correspondence: [mwinslow@stanford.edu](mailto:mwinslow@stanford.edu) (MMW) and [julsage@stanford.edu](mailto:julsage@stanford.edu) (JS)

14 **SUMMARY**

15 Metastasis is the main cause of death in cancer patients but remains a poorly understood  
16 process. Small cell lung cancer (SCLC) is one of the most lethal and most metastatic types of  
17 human cancer. SCLC cells normally express neuroendocrine and neuronal gene programs but  
18 accumulating evidence indicates that these cancer cells become relatively more neuronal and less  
19 neuroendocrine as they gain the ability to metastasize. Here we show that mouse and human  
20 SCLC cells in culture and *in vivo* can grow cellular protrusions that resemble axons. The  
21 formation of these protrusions is controlled by multiple neuronal factors implicated in  
22 axonogenesis, axon guidance, and neuroblast migration. Disruption of these axon-like  
23 protrusions impairs cell migration in culture and inhibits metastatic ability *in vivo*. The co-option  
24 of developmental neuronal programs is a novel molecular and cellular mechanism that  
25 contributes to the high metastatic ability of SCLC.

## 26 INTRODUCTION

27 Metastases are a major cause of cancer-related morbidity and mortality. By the time cancer  
28 cells leave their primary site and spread to distant sites, they have acquired the ability to migrate  
29 and invade, as well as characteristics that enable them to survive and proliferate within new  
30 microenvironments. These phenotypes are likely driven by changes in gene expression and  
31 epigenetic programs that allow cancer cells to overcome the many hurdles that normally  
32 constrain the metastatic process. Despite recent advances, our understanding of the principles  
33 and mechanisms underlying metastasis remains incomplete, including how changes in molecular  
34 programs can translate into selective advantages that enable cancer cells to spread to other organs  
35 (Fidler, 2003, Lambert *et al.*, 2017, Obenauf and Massague, 2015).

36 Small cell lung carcinoma (SCLC) is a high-grade neuroendocrine cancer that accounts for  
37 ~15% of all lung cancers and causes over 200,000 deaths worldwide each year (Sabari *et al.*,  
38 2017). The ability of SCLC cells to leave the primary tumor and establish inoperable metastases  
39 is a major cause of death and a serious impediment to successful therapy (Farago and Keane,  
40 2018, van Meerbeeck *et al.*, 2011). SCLC is one of the most metastatic human cancers, with over  
41 60% of SCLC patients presenting with disseminated disease at the time of diagnosis, often  
42 including liver, bone, brain, and secondary lung metastases (Nakazawa *et al.*, 2012, Riihimaki *et*  
43 *al.*, 2014). Molecular analyses to understand metastatic progression of human cancer are often  
44 limited by difficulties in accessing tumor samples at defined stages. This problem is especially  
45 true for SCLC, since patients with metastatic disease rarely undergo surgery (Barnes *et al.*,  
46 2017). Genetically engineered mouse models of human SCLC recapitulate the genetics,  
47 histology, therapeutic response, and highly metastatic nature of the human disease (Gazdar *et al.*,  
48 2015, Kwon and Berns, 2013, Rudin *et al.*, 2019). These genetically engineered mouse models

49 recapitulate cancer progression in a controlled manner and allow for the isolation of primary  
50 tumors and metastases directly from their native microenvironment. Recently, we and others  
51 have used mouse models to uncover gene expression programs that are enriched in SCLC  
52 metastases (Denny *et al.*, 2016, Semenova *et al.*, 2016, Wu *et al.*, 2016, Yang *et al.*, 2018).  
53 While SCLC cells display features of neuroendocrine cells, the gene expression programs in  
54 metastatic SCLC include not only genes normally expressed in pulmonary neuroendocrine cells  
55 but also those expressed in neurons (Carney *et al.*, 1982, Cutz, 1982, Broers *et al.*, 1987,  
56 Anderson *et al.*, 1988). Higher levels of the neuronal markers such as NSE (neuron-specific  
57 enolase) correlate with shorter survival and more metastatic disease in SCLC patients (Carney *et*  
58 *al.*, 1982, Dong *et al.*, 2019, van Zandwijk *et al.*, 1992). Broad neuronal gene expression  
59 programs are enriched in metastases from mouse models of SCLC, however, whether SCLC  
60 cells actually gain neuronal characteristics and whether neuronal features are key regulators of  
61 metastatic ability has not been previously characterized (Denny *et al.*, 2016, Wu *et al.*, 2016,  
62 Yang *et al.*, 2018, Böttger *et al.*, 2019).

63 Here we find that the metastatic state of SCLC is linked to the growth of protrusions that  
64 resemble axons. These axon-like growths increase the ability of SCLC cells to migrate and  
65 metastasize, thus representing a cellular mechanism that enhances the metastatic ability of SCLC  
66 cells that have transitioned to a more neuronal cell state.



## 67 **RESULTS**

### 68 **SCLC cells can form long cellular protrusions in culture and *in vivo***

69 To investigate SCLC migration, we developed an assay in which SCLC cells, which  
70 classically grow in culture as floating spheres or aggregates, are grown as a monolayer under  
71 Matrigel ((Denny *et al.*, 2016) and Methods). Unexpectedly, we noticed that cells from some  
72 SCLC cell lines (N2N1G, 16T, 6PF) derived from the  $Rb^{ff};p53^{ff}$  (*DKO*) and  $Rb^{ff};p53^{ff};p130^{ff}$   
73 (*TKO*) genetically engineered mouse models form long cellular protrusions into cell-free spaces  
74 (Figure 1A-B). To determine whether these structures specifically project into cell-free areas or  
75 they also exist within monolayers, we cultured a minor fraction of fluorescently-labeled,  
76 GFP<sup>positive</sup> SCLC cells with control SCLC cells. We found that SCLC cells also form protrusions  
77 when they are in close contact with surrounding cancer cells (Figure S1A). Similar mixing  
78 experiments performed in subcutaneous allografts also documented the growth of protrusions by  
79 SCLC cells *in vivo* (Figure 1C-D). Finally, similar structures also extend from SCLC micro-  
80 metastases in the liver in the autochthonous *TKO* mouse model and after intravenous  
81 transplantations of SCLC cells (Figure S1B-C).

82 Human SCLC patient-derived xenografts (PDXs) recapitulate many important features of the  
83 human disease (e.g. (Gardner *et al.*, 2017, Saunders *et al.*, 2015)). To label rare cancer cells  
84 within human SCLC PDXs and identify whether they had protrusions in unperturbed tumors, we  
85 used DiI tracing. DiI is a lipophilic dye that diffuses within cell membranes and has been widely  
86 employed to label projections from individual neurons (Heilingoetter and Jensen, 2016, Mufson  
87 *et al.*, 1990). Protrusions from SCLC cells were easily identifiable in two out of three PDX  
88 models (Figure 1E-F). In the 2D monolayer culture system, not all human SCLC cell lines  
89 formed protrusions, but NCI-H446 cells formed long protrusions into cell-free areas analogous to

90 those that formed in human SCLC PDX (Figure S1D-E). NCI-H446 cells also formed  
91 protrusions when grown as xenografts (Figure S1F).

92 These observations indicated that at least a subset of SCLC cells, which are often described  
93 as being “small round blue” cells, can develop long cellular protrusions. We next sought to  
94 investigate the nature of these protrusions and uncover their possible role in metastatic SCLC.

### 95 **SCLC protrusions resemble axons and SCLC cells with protrusions migrate similar to** 96 **neuroblasts**

97 SCLC cells express typical neuroendocrine genes but also neural and neuronal genes (Carney  
98 *et al.*, 1982, Cutz, 1982). This observation led us to investigate whether the protrusions were  
99 similar to neuronal axons or dendrites. We identified a list of 70 genes classically associated in  
100 the scientific literature with axonogenesis and axon guidance, and found that many of these  
101 genes are expressed in at least subsets of primary human SCLCs (George *et al.*, 2015)  
102 (Table S1). Thus, the gene expression programs controlling axonal growth in neuronal cells are  
103 also present in SCLC cells. We previously performed gene expression analyses on purified  
104 cancer cell from primary tumors and metastases from two mouse models of SCLC (Denny *et al.*,  
105 2016, Yang *et al.*, 2018). In these studies, we found a general increase in the expression of  
106 neuronal gene expression programs during tumor progression. Indeed, almost all (69/70) of the  
107 selected candidate genes were expressed in metastatic SCLCs, indicating that murine SCLC  
108 tumors and cell lines derived from these tumors represent a tractable system with which to  
109 investigate neuronal programs in SCLC (Table S2). Pathway and process enrichment analysis on  
110 these 69 genes confirmed their connection with axon guidance, neuron migration, and nervous  
111 system development (Table S3).

112 To further investigate the nature of these SCLC protrusions, we assessed their expression of  
113 canonical axonal and dendritic proteins. The protrusions that form from murine and human  
114 SCLC cell lines were uniformly positive for the expression of neuron-specific class III beta-  
115 tubulin (Tuj1). More importantly, these protrusions were positive for the axonal marker TAU  
116 while expression of the dendritic marker MAP2 was undetectable (Figure 2A-B and Figure S2A-  
117 C). Tuj1<sup>positive</sup>, TAU<sup>positive</sup> protrusions were also observed *in vivo* emanating from SCLC cells in  
118 the liver of *TKO* mice (Figure S3A). Furthermore, ~37% (29/79) of human primary SCLC  
119 tumors stained moderately or strongly positive for TAU (Figure S3B). Together, these  
120 observations showed that SCLC tumors express axonal markers in different contexts and  
121 suggested that the protrusions observed on SCLC cells are axon-like.

122 We quantified the length of protrusions and found that they were often 5 to 10 times longer  
123 than the diameter of the cell body (~8  $\mu\text{m}$ ) (Figure 2C). The length and the frequency of these  
124 axon-like protrusions suggested that they might influence the behavior of SCLC cells. We  
125 investigated and quantified the features of SCLC cells with and without protrusions using time-  
126 lapse microscopy. Initial observations of mouse SCLC cells showed that the protrusions were  
127 very dynamic (Figure 2C and Movie S1). In these movies, we noticed that the protrusions  
128 resembled cellular processes that have been described in neuroblasts and with the movement of  
129 SCLC cells along these protrusions reminiscent of neuroblast chain migration (Oudin *et al.*,  
130 2011, Lois *et al.*, 1996, Zhou *et al.*, 2015). Indeed, when we quantified the movement of SCLC  
131 cell along protrusions, SCLC cell lines that form protrusions (16T and N2N1G cell lines)  
132 displayed increased saltatory activity compared to SCLC cells that do not form protrusions  
133 (KP22 cell line) (Figure 2D-H and Movies S2-4). The velocity of SCLC cells that form

134 protrusions was also greatly increased compared to cells that do not form protrusions  
135 (Figure S2D).

136 Together, these results indicate that SCLC cells can generate axon-like protrusions and that  
137 these projections facilitate migration in a manner that is qualitatively similar to neuroblast  
138 migration during brain development.

### 139 **Loss of Axon-like protrusions inhibits the migration of SCLC cells**

140 To investigate the functional importance of these axon-like protrusions, we focused on 13  
141 genes (out of the 69 genes selected above) that encode for proteins involved in diverse aspects of  
142 axon formation, axon guidance, and neuronal migration (Table S4). These 13 genes are all  
143 expressed in at least a subset of human SCLC tumors (Figure S4A) (data from (George *et al.*,  
144 2015)). We excluded gene families for which functional overlap and compensatory mechanism  
145 were likely. STRING analysis and literature searches confirmed that these 13 candidates had a  
146 significant connection with biological processes related to neurogenesis and the regulation of  
147 neuron projection development but that the proteins were not all directly connected and thus  
148 likely contribute to distinct aspects of these biological processes (Figure S4B and Table S5). In  
149 the 25 human SCLC cell lines analyzed in the Cancer Dependency Map project, knock-down of  
150 these 13 genes rarely affected the expansion of SCLC cells in culture, consistent with these genes  
151 influencing aspects of cell physiology not related to the cell cycle (Table S6 and Figure S4C-D).

152 We first knocked-down each of these genes with two shRNAs in a murine SCLC cell line  
153 derived from a lymph node metastasis (N2N1G). We confirmed stable knockdown by RT-qPCR  
154 (Table S7) and quantified the development of protrusions in the monolayer culture assay. Knock-  
155 down of 11 of the 13 genes significantly reduced the number of protrusions with at least one

156 shRNA (Figure 3A-B and Figure S5A). The observation that the knock-down of multiple factors  
157 normally implicated at distinct steps of axonal growth reduces the development of the  
158 protrusions from SCLC cells further bolsters the notion that these protrusions are similar to  
159 neuronal axons. Knock-down of the many genes involved in axon formation, axonal guidance,  
160 and neuronal migration also reduced cell migration in the same assay (Figure 3B). Quantification  
161 of cell migration showed that inhibition of migration correlated with loss of the axon-like  
162 protrusions (Figure 3C-D). We validated the knock-down for two of the top candidates, *Gap43*  
163 and *Fez1* genes, by immunoblot for the corresponding proteins in N2N1G cells (Figure S5B-C).  
164 We further validated the effects of knocking down these two factors on the growth of protrusions  
165 and cell migration in a second SCLC cell line (16T; Figure 3E-J and Figure S5D-E).

166 Together, these data show that SCLC cells with axon-like protrusions migrate in culture  
167 similar to what has been described for neuroblasts and that disruption of these protrusions by  
168 knocking-down a variety of genes involved in axonogenesis and neuronal migration also affects  
169 SCLC migration.

### 170 **Knock-down of genes associated with the formation of protrusions results in decreased** 171 **metastatic potential**

172 The link between axon-like protrusions and migration *in vitro* led us to investigate whether  
173 these axon-like protrusions promote the metastatic ability of SCLC cells *in vivo*. In support of  
174 this idea, we found that the expression of neuron-specific class III beta-tubulin and TAU was  
175 barely detectable in non-metastatic tumors in the lungs of *TKO* mice 3 months after cancer  
176 initiation while a majority of later stage tumors stained strongly positive for both proteins  
177 (Figure S6A-B).

178 To test the role of these protrusions in the metastatic process *in vivo*, we investigated whether

179 SCLC cells with *Gap43* or *Fez1* knocked-down had reduced metastatic ability. The products of  
180 these genes are thought to regulate axonal development in entirely distinct manners but knock-  
181 down of each reduced the formation of protrusions and cell migration in culture. We first  
182 assessed whether *Gap43* and *Fez1* knock-down reduced the metastatic ability of mouse N2N1G  
183 SCLC cells after transplanting control and knock-down cells into recipient mice and assessing  
184 metastasis formation 4-5 weeks after intravenous injection. Knock-down of each of these pro-  
185 protrusion factors significantly reduced the number of metastases as assessed by tumor counts at  
186 the surface of the liver (Figure S7A-B). To determine whether GAP43 and FEZ1 are simply  
187 required for tumor growth *in vivo*, we transplanted *Gap43* and *Fez1* knock-down cells  
188 subcutaneously and quantified tumor growth. Knock-down of these genes had no effect on  
189 subcutaneous tumor growth suggesting that the effects on metastatic ability likely represent the  
190 disruption of phenotypes uniquely associated with the metastatic process (Figure S7C). We  
191 repeated these experiments with two independent shRNAs for each gene in both N2N1G and  
192 16T SCLC cells, which confirmed that *Gap43* and *Fez1* knock-down inhibits the formation of  
193 liver metastases after intravenous injection of SCLC cells (Figure 4A-H and Figure S7D-E).

194 The absence of growth defects in subcutaneous tumors following *Gap43* and *Fez1* knock-  
195 down suggested that these genes may affect earlier steps of the metastatic cascade. To test this,  
196 we performed similar intravenous transplant experiments but quantified the presence of SCLC  
197 cells in the liver 2 days after injection (Figure 4I). Quantification of GFP<sup>positive</sup> cancer cells in the  
198 liver by flow cytometry documented a significant reduction in metastatic seeding by SCLC cells  
199 with *Gap43* and *Fez1* knocked-down (Figure 4J-M and Figure S7F-I). Thus, loss of genes  
200 associated with the formation of axon-like protrusions affects early metastatic seeding of SCLC  
201 cells in the liver, which ultimately translates to reduced metastatic burden.

## 202 **DISCUSSION**

203 While metastasis remains a major cause of morbidity and mortality in SCLC patients, its  
204 underlying mechanisms remain poorly understood and no therapeutic strategies exist to prevent  
205 or target it. Here we investigated the function of neuronal gene expression programs in  
206 metastatic SCLC. We found that SCLC cells can grow axon-like protrusions and that these  
207 protrusions contribute to the migratory and metastatic phenotypes of these cells. This study  
208 identifies a cellular mechanism by which a neuroendocrine-to-neuronal transition promotes  
209 metastasis of SCLC cells.

210 The expression of neuronal factors in SCLC has been known for more than three decades  
211 and has been used as a marker for disease progression (Carney *et al.*, 1982, Cutz, 1982, Broers *et*  
212 *al.*, 1987, Anderson *et al.*, 1988). However, whether neuronal programs in SCLC cells play a  
213 direct role in SCLC progression had not been rigorously investigated. We uncovered the growth  
214 of axon-like protrusions as one functional aspect of neuronal differentiation in SCLC and  
215 provide data to support a role for these protrusions in migration and metastasis. It is likely that  
216 other phenotypes usually associated with neurons beyond these axon-like protrusions also  
217 contribute to the expansion and the spread of SCLC cells. Beyond facilitating metastatic seeding  
218 to the liver, these axon-like protrusions may have other functions, including helping SCLC cells  
219 migrate within the primary tumor, intravasate into the bloodstream, and move within the  
220 parenchyma during metastatic expansion (Shibue *et al.*, 2012). Future investigation of the roles  
221 of axon-like protrusions in SCLC will likely benefit from additional genetic analyses as well as  
222 high-resolution *in vivo* imaging methods. Recent evidence suggests that several other human  
223 tumor types also increase the expression of neuronal programs as they become more metastatic,  
224 especially to the brain (Wingrove *et al.*, 2019). It will be important for future studies to

225 determine if aspects of the neuronal program also contribute to the striking ability of SCLC cells  
226 to seed and expand in the brain (Lukas *et al.*, 2017).

227 Our data indicate that SCLC metastasis is facilitated by the development of axon-like  
228 protrusions, but other molecular mechanisms certainly also increase the probability that a cancer  
229 cell will successfully overcome all the hurdles that limit the development of tissue destructive  
230 metastases. For instance, we found that knock-down of *Dcx* (coding for Doublecortin) has little  
231 to no effect on the number of protrusions but strongly inhibits migration in our 2D Matrigel  
232 assay (Figure 3A-B), thus suggesting that Doublecortin promotes SCLC migration independent  
233 from any impact of protrusion formation.

234 The formation of protrusions in SCLC cells is controlled by pathways previously implicated  
235 in the formation of axons and the migration of neuronal cells but it is unclear how the expression  
236 of these pro-protrusion genes is coordinated. We and others have identified a role for the NFIB  
237 transcription factor in SCLC metastasis and the induction of gene programs linked with  
238 axonogenesis and neuronal migration (Denny *et al.*, 2016, Semenova *et al.*, 2016, Wu *et al.*,  
239 2016). However, overexpression of NFIB in naturally NFIB<sup>low</sup> cell lines is not sufficient to  
240 induce the growth of protrusions in SCLC cells (unpublished observations). Thus, the upstream  
241 factors that control these neuronal programs in SCLC remain to be characterized. Accumulating  
242 evidence indicates the existence of several subtypes of SCLC, which are defined by the  
243 expression of key transcription factors (Rudin *et al.*, 2019). The murine cell lines used in this  
244 study are of the “SCLC-A” subtype (driven by the transcription factor ASCL1) but the human  
245 cell line NCI-H446 and the PDX model LU86 (Saunders *et al.*, 2015) belong to the “variant”  
246 subtype (SCLC-N, driven by the transcription factor NEUROD1). This suggests that the ability  
247 to grow protrusions may exist across subtypes. Possibly a combination of genetic and epigenetic



248 factors contributes to the ability of SCLC to grow protrusions. Adhesion molecules and other  
249 factors in the tumor microenvironment are also likely to contribute to the formation of  
250 protrusions *in vivo* (Guo *et al.*, 2000).

251        Could an understanding of the molecular and cellular processes related to axon-like  
252 protrusions in SCLC cells ultimately be translated into clinical benefit for SCLC patients?  
253 Previous studies on SCLC have targeted the CXCR4 chemokine receptor due to its role in cell  
254 adhesion and migration and its expression in SCLC cells (Burger *et al.*, 2003, Teicher, 2014,  
255 Taromi *et al.*, 2016). CXCR4 also contributes to the formation of axon-like protrusions (Figure  
256 3). In a recent clinical trial in SCLC patients, CXCR4 inhibition was well tolerated but this  
257 inhibition did not significantly reduce disease progression (Salgia *et al.*, 2017). Mechanisms that  
258 drive the ability of cancer cells to overcome early barriers of metastatic seeding will likely need  
259 to be employed in specific settings where inhibition of the metastatic process would logically  
260 provide clinical benefit. For example, in patients with resectable SCLC, inhibition of pro-  
261 metastatic pathways in the neo-adjuvant and/or adjuvant setting could reduce the frequency or  
262 multiplicity of metastatic relapse.

263        More generally, the transition from a neuroendocrine state to a state where neuroendocrine  
264 differentiation is decreased but neuronal differentiation is increased may be related to the  
265 exceptional plasticity of SCLC cells (reviewed in (Yuan *et al.*, 2019)). Epithelial-to-  
266 mesenchymal transition (EMT) is thought to contribute to migration, metastasis, and resistance  
267 to treatment in many cancer contexts and may play a role in SCLC (Allison Stewart *et al.*, 2017,  
268 Krohn *et al.*, 2014, Canadas *et al.*, 2014, O'Brien-Ball and Biddle, 2017, Singh and Settleman,  
269 2010). Vascular mimicry (or epithelial-to-endothelial transition (EET) (Yuan *et al.*, 2019)) may  
270 also contribute to tumor growth and response to treatment in SCLC (Williamson *et al.*, 2016).

271 Similarly, Notch-induced dedifferentiation to a non-neuroendocrine state can generate an intra-  
272 tumoral niche that protects neuroendocrine SCLC cells (Lim *et al.*, 2017). Based on our results  
273 and recent observations in other cancers (Wingrove *et al.*, 2019), we propose that an epithelial-  
274 to-neuronal transition contributes to key aspects of cancer metastasis. Further characterization of  
275 this neuronal state in both neuroendocrine and non-neuroendocrine cancers is likely to uncover  
276 novel mechanisms of cancer progression and may ultimately offer new insight into metastasis-  
277 blocking strategies in the clinic.

## 278 MATERIAL AND METHODS

### 279 Mouse model

280 All experiments were performed in accordance with Stanford University Institutional Animal  
281 Care and Use Committee guidelines. *Trp53<sup>flox</sup>*, *Rb1<sup>flox</sup>*, *p130<sup>flox</sup>*, and *R26<sup>mTmG</sup>* mice have been  
282 described (Denny *et al.*, 2016, Muzumdar *et al.*, 2007). Tumors were initiated by inhalation of  
283 Adeno-CMV-Cre (University of Iowa Vector Core, Iowa city, Iowa) as described in (Denny *et*  
284 *al.*, 2016), following a published protocol (DuPage *et al.*, 2009).

### 285 Cell culture

286 All murine and human SCLC cell lines used in this study grow as floating aggregates and were  
287 cultured in RPMI with 10% FBS, 1×GlutaMax, and 100 U/mL penicillin-streptomycin (Gibco,  
288 Thermo Fisher Scientific, Waltham, MA). Human cell lines were originally purchased from  
289 ATCC and cell identities were validated by Genetica DNA Laboratories using STR analysis.  
290 NJH29 SCLC cells were derived from a patient-derived xenograft (PDX), which has been  
291 described (Jahchan *et al.*, 2013). The LU86 and LU102 models were obtained from Stemcentrx  
292 (Saunders *et al.*, 2015). The JHU-LX102 (LX102) model was a kind gift from Dr. Watkins  
293 (Leong *et al.*, 2014). The murine cell lines were described (Denny *et al.*, 2016, Yang *et al.*,  
294 2018). Briefly, 16T and KP22 cells are from individual primary tumors from the lungs of *Rb/p53*  
295 *DKO* mice. N2N1G cells were derived from a lymph node metastasis in an *Rb/p53/p130 TKO*;  
296 *Rosa26<sup>mTmG</sup>* mouse. 6PF cells were derived from metastatic cells in the plural fluid in an  
297 *Rb/p53/p130 TKO*; *Rosa26<sup>mTmG</sup>* mouse. All cell lines were confirmed to be mycoplasma-  
298 negative (MycoAlert Detection Kit, Lonza, Basel, Switzerland).

### 299 *In vitro* 2D Matrigel migration and protrusion assay

300 Silicone inserts (ibidi 80209, Grafelfing, Germany) were attached to wells in 12-well (up to two  
301 inserts) or 24-well (one insert) plates pre-coated with poly-D-lysine for 15 minutes (Sigma-  
302 Aldrich, St. Louis, MO).  $\sim 8 \times 10^5$  cells were seeded to each chamber of the insert in 100  $\mu$ L  
303 resulting in cells at  $\sim 80$ - $90\%$  confluency. After at least 6 hours, the inserts were carefully  
304 removed and 0.75-1 mL of a 1:1 Matrigel (Corning, Corning, NY)-cell culture media mix was  
305 slowly added to cover each well. 1 mL of cell culture media was added on top of the solidified  
306 Matrigel to prevent drying. For quantification of cell migration and protrusions, the number of  
307 cells and the number of protrusions were counted in the gap at 10x under the microscope. The  
308 time points (between 36 hours and 96 hours) were dependent on the growth rate of the cell  
309 populations.

### 310 **Live imaging of cell migration and quantification**

311 SCLC cells were plated as described in the 2D Matrigel migration assay and cultured for 24  
312 hours before imaging. Then 10x DIC images were collected every 15 minutes for 25 hours using  
313 a Zeiss LSM 710 confocal microscope (Zeiss, Oberkochen, Germany) with a live imaging  
314 chamber set to 37°C, 5% CO<sub>2</sub>. To quantify the time-lapse movies, we examined nuclear  
315 movement and process length (as described in (Oudin *et al.*, 2011)) using the FIJI software (NIH,  
316 Bethesda, USA). The position of the cell nucleus was tracked in each frame using the Manual  
317 Tracking plugin to obtain the distance migrated by the nucleus per frame and the average cell  
318 velocity over the entire movie. Neuronal cell migration occurs via three steps: the cell extends a  
319 leading process, the nucleus translocates into the leading process via nucleokinesis, and the cell  
320 loses its trailing process. To quantify translocation events, we quantified the fractions of steps  
321 taken by each that were over  $8\mu$ m, which represents the length of one cell body and a nuclear  
322 translocation event. The process length was calculated by tracing a line from the cell body to the

323 tip of the leading process about 6hrs into the movie. Over 30 cells were tracked and analyzed per  
324 condition.

### 325 **Immunostaining of cells in cultures**

326 Cells were fixed with 4% PFA for 15 minutes, permeabilized with 0.1% Triton and stained for  
327 Tuj1 (1:500, BioLegend 801213, San Diego, CA), TAU (1:1000, Dako A0024, Santa Clara,  
328 CA), and MAP2 (1:500, EMD Millipore AB5622, Burlington, MA), and with a goat anti-rabbit  
329 secondary antibody (Invitrogen). Membrane GFP was stained (Abcam ab13970, Cambridge,  
330 UK) to mark SCLC cells and the expression of the other neuronal markers were checked using a  
331 fluorescence scope (Zeiss LSM 880). Staining was quantified by counting directly under the  
332 microscope (at 40x magnification).

### 333 **Whole mount immunofluorescence staining and imaging of tumors**

334 Detailed methods for whole mount immunofluorescence staining have been described (Yang *et*  
335 *al.*, 2018). Subcutaneous tumors with 5-10% GFP<sup>positive</sup> labeled cells mixed with non-GFP  
336 labeled SCLC tumor cells were dissected and were fixed in 4% paraformaldehyde and sectioned  
337 with a vibrating blade microtome at 500  $\mu$ m thickness. Tumor slices were optically cleared using  
338 the CUBIC method, comprised of a three-hour incubation at room temperature in CUBIC 1  
339 reagent and long-term storage in CUBIC 2 at 4°C (Susaki *et al.*, 2015). Sections were imaged  
340 using a Zeiss LSM 780 laser scanning confocal microscope.

341 For DiI staining and imaging, subcutaneously transplanted human SCLC xenograft were  
342 harvested after 3 weeks of growth and cut into 500mm ~1 cm thick slices. Tumor pieces were  
343 stained with the red fluorescent tracer DiI (D282, Thermo Fisher Scientific) in a spot-wise  
344 manner, incubated in 37°C, 5% CO<sub>2</sub> chamber for 20min and washed 3 times with PBS+10%FBS

345 to remove excess DiI before imaging. Images were collected using a Leica SP5 scope (Leica,  
346 Buffalo Grove, IL) with a water immersion lens.

### 347 **Histology and immunohistochemistry**

348 Mouse tumor samples were fixed in 4% formalin and paraffin embedded. Hematoxylin and  
349 Eosin (H&E) staining was performed using standard methods. For immunohistochemistry, we  
350 used antibodies to GFP (Abcam ab6673), UCHL1 (Sigma-Aldrich HPA005993), Tuj1  
351 (BioLegend 801213), and TAU (Dako A0024).

352 Tissue microarrays (LC818a, US Biomax, Rockville, MD) were stained for TAU and scored by a  
353 board-certified pathologist on a three point scale as follows: 0 = negative or weak staining of less  
354 than 10% cells, 1 = moderate intensity staining, 2 = strong intensity staining.

### 355 **Candidate gene knockdown**

356 Stable knockdown of candidate genes was performed using lentiviral pLKO vectors and  
357 puromycin-resistance selection (Sigma-Aldrich). For lentivirus production,  $7.5 \times 10^6$  HEK293T  
358 cells were seeded into 10 cm dishes and transfected with the vector of interest using PEI  
359 (Polysciences 23966-2, Warrington, PA) along with pCMV-VSV-G (Addgene #8454) envelope  
360 plasmid and pCMV-dR8.2 dvpr (Addgene #8455) packaging plasmid. The medium was changed  
361 24 hours later. Supernatants were collected at 36 hours and 48 hours, passed through a 40  $\mu$ m  
362 filter and applied at full concentration to target cells. Two days after transduction cells were  
363 selected with Puromycin (2  $\mu$ g/mL, Thermo Fisher Scientific, Waltham, MA) for at least 1 week.  
364 Knockdown was confirmed by RT-qPCR as in (Denny *et al.*, 2016) and immunoblot analysis.  
365 Table S7 shows the sequences of the oligonucleotides used to knock down the candidate genes.  
366 Note that the expression of the shRNAs targeting GFP partially decreased GFP expression, but

367 cancer cells were still GFP<sup>positive</sup> and could be well-detected by flow cytometry.

### 368 **Immunoblot analysis**

369 GAP43 (Abcam), FEZ1 (Cell Signaling, Danvers, MA), and HSP90 (BD Transduction  
370 Laboratories, San Jose, CA) antibodies were used to confirm the knockdown of each gene at the  
371 protein level. Briefly, denatured protein samples were run on 4-12% Bis-Tris gels (NuPage,  
372 Thermo Fisher Scientific, Waltham, MA) and transferred onto PVDF membrane. Primary  
373 antibody incubations were followed by secondary HRP-conjugated anti-mouse (Santa Cruz  
374 Biotechnology, Santa Cruz, CA) and anti-rabbit (Santa Cruz Biotechnology) antibodies and  
375 membranes were developed with the ECL2 Western Blotting Substrate (Pierce Protein Biology,  
376 Thermo Fisher Scientific).

### 377 **Transplantation assays**

378 For long-term metastasis assays,  $3 \times 10^4$  of N2N1G cells or  $1 \times 10^5$  of 16T cells were injected  
379 intravenously injected into the lateral tail vein of NOD.*Cg-Prkdc<sup>scid</sup>Il2rg<sup>tm1Wjl</sup>/SzJ* (NSG) mice  
380 (The Jackson Laboratories, Bar Harbor, ME - Stock number 005557). Mouse livers were  
381 harvested at 4-6 weeks after injection. Tumor number was quantified by directly counting on  
382 liver surface and also quantified by counting tumor number or areas on the H&E sections. For  
383 subcutaneous injection,  $5 \times 10^4$  cells were resuspended in 100  $\mu$ L PBS and mixed with 100  $\mu$ L  
384 Matrigel (Corning, 356231, Corning, NY) with 4 injection sites per mouse. For both  
385 subcutaneous and intravenous injections, SCLC cells were transplanted into age-matched  
386 gender-matched NSG mice. For short-term tumor seeding assays,  $2 \times 10^7$  of N2N1G cells or  
387  $5 \times 10^7$  of 16T cells were transplanted intravenously into the lateral tail vein of NSG mice.  
388 N2N1G, derived from *Rb/p53/p130 TKO; Rosa26<sup>mTmG</sup>* mouse, has endogenous GFP expression  
389 and 16T, derived from *Rb/p53 TKO* mouse, was stained by live cell stain CFSE (Thermo Fisher

390 Scientific, C34554) and washed before intravenous injection. 2 days after transplantation, mouse  
391 livers were harvested, digested into single cell suspension and analyzed by FACS for the  
392 percentage of GFP<sup>positive</sup> cancer cells. FACS data were analyzed by FlowJo.

### 393 **Pathway and process enrichment analysis**

394 Metascape (metascape.org) was used to analyze the lists of genes involved in axonogenesis and  
395 neuronal migration. Metascape integrates data from KEGG Pathway, GO Biological Processes,  
396 Reactome Gene Sets, Canonical Pathways and CORUM (Zhou *et al.*, 2019). The analysis of  
397 interactions between the top 13 candidate genes was performed using STRING (string-db.org)  
398 (Szklarczyk *et al.*, 2018). The analysis of dependency upon knock-down was performed using  
399 the in the Cancer Dependency Map project (depmap.org/portal/) in February 2019 with the  
400 Combined RNAi (Broad, Novartis, Marcotte) data (Tsherniak *et al.*, 2017).

### 401 **Statistics**

402 Statistical significance was assayed with GraphPad Prism software. The statistical tests used, the  
403 numerical p-values, and the number of independent replicates is indicated in the figure legends.



404 **ACKNOWLEDGEMENTS**

405 We thank Pauline Chu and Jon Mulholland for technical assistance; Alexandra Orantes and  
406 Alyssa Ray for administrative support; Kang Shen, Pengpeng Li, Gregor Bieri, Nick Kramer,  
407 Gregory Giannone, and Olivier Rossier for helpful discussions; and members of the Winslow  
408 and Sage laboratories for helpful comments. We thank Dr. Charlie Rudin and Stemcentrx for the  
409 PDX models. We thank the Stanford Shared FACS Facility and Cell Sciences Imaging Facility.  
410 This work was supported by NIH R01 CA206540 (to JS) and in part by the Stanford Cancer  
411 Institute support grant (NIH P30 CA124435). DY was supported by a Stanford Graduate  
412 Fellowship and by a TRDRP Dissertation Award (24DT-0001). FQ was supported by a Damon  
413 Runyon Postdoctoral Fellowship. HC was supported by a Tobacco-Related Disease Research  
414 Program Postdoctoral Fellowship. C-HC was supported by an American Lung Association  
415 Fellowship. B.M.G. was supported by the Pancreatic Cancer Action Network – AACR  
416 Fellowship in memory of Samuel Stroum (14-40-25-GRUE), was a Hope Funds for Cancer  
417 Research Fellow supported by the Hope Funds for Cancer Research (HFCR-15-06-07), and is a  
418 recipient of an Emmy Noether Award from the German Research Foundation (DFG). MJO was  
419 supported by NIH R00 CA207866. J.S is the Harriet and Mary Zelencik Scientist in Children’s  
420 Cancer and Blood Diseases.

421 **COMPETING INTERESTS**

422 J.S. receives research funding from Stemcentrx/Abbvie, Pfizer, and Revolution Medicines and  
423 owns stock in Forty Seven Inc.

424 **REFERENCES**

- 425 1. Fidler IJ. The pathogenesis of cancer metastasis: the 'seed and soil' hypothesis revisited.  
426 *Nat Rev Cancer*. 2003;3(6):453-8. doi: 10.1038/nrc1098
- 427 2. Lambert AW, Pattabiraman DR, Weinberg RA. Emerging Biological Principles of  
428 Metastasis. *Cell*. 2017;168(4):670-91. doi: 10.1016/j.cell.2016.11.037
- 429 3. Obenauf AC, Massague J. Surviving at a Distance: Organ-Specific Metastasis. *Trends*  
430 *Cancer*. 2015;1(1):76-91. doi: 10.1016/j.trecan.2015.07.009
- 431 4. Sabari JK, Lok BH, Laird JH, Poirier JT, Rudin CM. Unravelling the biology of SCLC:  
432 implications for therapy. *Nature reviews Clinical oncology*. 2017;14(9):549-61. doi:  
433 10.1038/nrclinonc.2017.71
- 434 5. Farago AF, Keane FK. Current standards for clinical management of small cell lung  
435 cancer. *Transl Lung Cancer Res*. 2018;7(1):69-79. doi: 10.21037/tlcr.2018.01.16
- 436 6. van Meerbeeck JP, Fennell DA, De Ruyscher DK. Small-cell lung cancer. *Lancet*.  
437 2011;378(9804):1741-55. Epub 2011/05/14. doi: S0140-6736(11)60165-7 [pii]  
438 10.1016/S0140-6736(11)60165-7
- 439 7. Nakazawa K, Kurishima K, Tamura T, Kagohashi K, Ishikawa H, Satoh H, Hizawa N.  
440 Specific organ metastases and survival in small cell lung cancer. *Oncology letters*.  
441 2012;4(4):617-20. Epub 2012/12/04. doi: 10.3892/ol.2012.792
- 442 8. Riihimaki M, Hemminki A, Fallah M, Thomsen H, Sundquist K, Sundquist J, Hemminki  
443 K. Metastatic sites and survival in lung cancer. *Lung Cancer*. 2014;86(1):78-84. doi:  
444 10.1016/j.lungcan.2014.07.020
- 445 9. Barnes H, See K, Barnett S, Manser R. Surgery for limited-stage small-cell lung cancer.  
446 *Cochrane Database Syst Rev*. 2017;4:CD011917. doi: 10.1002/14651858.CD011917.pub2
- 447 10. Gazdar AF, Savage TK, Johnson JE, Berns A, Sage J, Linnoila RI, MacPherson D,  
448 McFadden DG, Farago A, Jacks T, Travis WD, Brambilla E. The comparative pathology of  
449 genetically engineered mouse models for neuroendocrine carcinomas of the lung. *J Thorac*  
450 *Oncol*. 2015;10(4):553-64. doi: 10.1097/JTO.0000000000000459
- 451 11. Kwon MC, Berns A. Mouse models for lung cancer. *Mol Oncol*. 2013;7(2):165-77. Epub  
452 2013/03/14. doi: 10.1016/j.molonc.2013.02.010
- 453 12. Rudin CM, Poirier JT, Byers LA, Dive C, Dowlati A, George J, Heymach JV, Johnson  
454 JE, Lehman JM, MacPherson D, Massion PP, Minna JD, Oliver TG, Quaranta V, Sage J,  
455 Thomas RK, Vakoc CR, Gazdar AF. Molecular subtypes of small cell lung cancer: a synthesis of  
456 human and mouse model data. *Nat Rev Cancer*. 2019. doi: 10.1038/s41568-019-0133-9
- 457 13. Denny SK, Yang D, Chuang CH, Brady JJ, Lim JS, Gruner BM, Chiou SH, Schep AN,  
458 Baral J, Hamard C, Antoine M, Wislez M, Kong CS, Connolly AJ, Park KS, Sage J, Greenleaf  
459 WJ, Winslow MM. Nfib Promotes Metastasis through a Widespread Increase in Chromatin  
460 Accessibility. *Cell*. 2016;166(2):328-42. doi: 10.1016/j.cell.2016.05.052
- 461 14. Semenova EA, Kwon MC, Monkhorst K, Song JY, Bhaskaran R, Krijgsman O, Kuilman  
462 T, Peters D, Buikhuisen WA, Smit EF, Pritchard C, Cozijnsen M, van der Vliet J, Zevenhoven J,

- 463 Lambooi JP, Proost N, van Montfort E, Velds A, Huijbers IJ, Berns A. Transcription Factor  
464 NFIB Is a Driver of Small Cell Lung Cancer Progression in Mice and Marks Metastatic Disease  
465 in Patients. *Cell reports*. 2016;16(3):631-43. doi: 10.1016/j.celrep.2016.06.020
- 466 15. Wu N, Jia D, Ibrahim AH, Bachurski CJ, Gronostajski RM, MacPherson D. NFIB  
467 overexpression cooperates with Rb/p53 deletion to promote small cell lung cancer. *Oncotarget*.  
468 2016;7(36):57514-24
- 469 16. Yang D, Denny SK, Greenside PG, Chaikovsky AC, Brady JJ, Ouadah Y, Granja JM,  
470 Jahchan NS, Lim JS, Kwok S, Kong CS, Berghoff AS, Schmitt A, Reinhardt HC, Park KS,  
471 Preusser M, Kundaje A, Greenleaf WJ, Sage J, Winslow MM. Intertumoral Heterogeneity in  
472 SCLC Is Influenced by the Cell Type of Origin. *Cancer Discov*. 2018. doi: 10.1158/2159-  
473 8290.CD-17-0987
- 474 17. Carney DN, Marangos PJ, Ihde DC, Bunn PA, Jr., Cohen MH, Minna JD, Gazdar AF.  
475 Serum neuron-specific enolase: a marker for disease extent and response to therapy of small-cell  
476 lung cancer. *Lancet*. 1982;1(8272):583-5
- 477 18. Cutz E. Neuroendocrine cells of the lung. An overview of morphologic characteristics  
478 and development. *Exp Lung Res*. 1982;3(3-4):185-208
- 479 19. Broers JL, Rot MK, Oostendorp T, Huysmans A, Wagenaar SS, Wiersma-van Tilburg  
480 AJ, Vooijs GP, Ramaekers FC. Immunocytochemical detection of human lung cancer  
481 heterogeneity using antibodies to epithelial, neuronal, and neuroendocrine antigens. *Cancer*  
482 *research*. 1987;47(12):3225-34
- 483 20. Anderson N, Rosenblum M, Graus F, Wiley R, Posner J. Autoantibodies in  
484 paraneoplastic syndromes associated with small-cell lung cancer. *Neurology*. 1988;38(9):1391-
- 485 21. Dong A, Zhang J, Chen X, Ren X, Zhang X. Diagnostic value of ProGRP for small cell  
486 lung cancer in different stages. *Journal of thoracic disease*. 2019;11(4):1182-9
- 487 22. van Zandwijk N, Jassem E, Bonfrer JM, Mooi WJ, van Tinteren H. Serum neuron-  
488 specific enolase and lactate dehydrogenase as predictors of response to chemotherapy and  
489 survival in non-small cell lung cancer. *Semin Oncol*. 1992;19(1 Suppl 2):37-43
- 490 23. Böttger F, Semenova EA, Song J-Y, Ferone G, van der Vliet J, Cozijnsen M, Bhaskaran  
491 R, Bombardelli L, Piersma SR, Pham TV. Tumor Heterogeneity Underlies Differential Cisplatin  
492 Sensitivity in Mouse Models of Small-Cell Lung Cancer. *Cell reports*. 2019;27(11):3345-58. e4
- 493 24. Gardner EE, Lok BH, Schneeberger VE, Desmeules P, Miles LA, Arnold PK, Ni A,  
494 Khodos I, de Stanchina E, Nguyen T, Sage J, Campbell JE, Ribich S, Rekhtman N, Dowlati A,  
495 Massion PP, Rudin CM, Poirier JT. Chemosensitive Relapse in Small Cell Lung Cancer  
496 Proceeds through an EZH2-SLFN11 Axis. *Cancer Cell*. 2017;31(2):286-99. doi:  
497 10.1016/j.ccell.2017.01.006
- 498 25. Saunders LR, Bankovich AJ, Anderson WC, Aujay MA, Bheddah S, Black K, Desai R,  
499 Escarpe PA, Hampl J, Laysang A, Liu D, Lopez-Molina J, Milton M, Park A, Pysz MA, Shao H,  
500 Slingerland B, Torgov M, Williams SA, Foord O, Howard P, Jassem J, Badzio A, Czapiewski P,  
501 Harpole DH, Dowlati A, Massion PP, Travis WD, Pietanza MC, Poirier JT, Rudin CM, Stull  
502 RA, Dylla SJ. A DLL3-targeted antibody-drug conjugate eradicates high-grade pulmonary  
503 neuroendocrine tumor-initiating cells in vivo. *Sci Transl Med*. 2015;7(302):302ra136. doi:  
504 10.1126/scitranslmed.aac9459

- 505 26. Heilingoetter CL, Jensen MB. Histological methods for ex vivo axon tracing: A  
506 systematic review. *Neurol Res.* 2016;38(7):561-9. doi: 10.1080/01616412.2016.1153820
- 507 27. Mufson EJ, Brady DR, Kordower JH. Tracing neuronal connections in postmortem  
508 human hippocampal complex with the carbocyanine dye DiI. *Neurobiol Aging.* 1990;11(6):649-  
509 53
- 510 28. George J, Lim JS, Jang SJ, Cun Y, Ozretic L, Kong G, Leenders F, Lu X, Fernandez-  
511 Cuesta L, Bosco G, Muller C, Dahmen I, Jahchan NS, Park KS, Yang D, Karnezis AN, Vaka D,  
512 Torres A, Wang MS, Korbel JO, Menon R, Chun SM, Kim D, Wilkerson M, Hayes N,  
513 Engelmann D, Putzer B, Bos M, Michels S, Vlastic I, Seidel D, Pinther B, Schaub P, Becker C,  
514 Altmuller J, Yokota J, Kohno T, Iwakawa R, Tsuta K, Noguchi M, Muley T, Hoffmann H,  
515 Schnabel PA, Petersen I, Chen Y, Soltermann A, Tischler V, Choi CM, Kim YH, Massion PP,  
516 Zou Y, Jovanovic D, Kontic M, Wright GM, Russell PA, Solomon B, Koch I, Lindner M,  
517 Muscarella LA, la Torre A, Field JK, Jakopovic M, Knezevic J, Castanos-Velez E, Roz L,  
518 Pastorino U, Brustugun OT, Lund-Iversen M, Thunnissen E, Kohler J, Schuler M, Botling J,  
519 Sandelin M, Sanchez-Cespedes M, Salvesen HB, Achter V, Lang U, Bogus M, Schneider PM,  
520 Zander T, Ansen S, Hallek M, Wolf J, Vingron M, Yatabe Y, Travis WD, Nurnberg P, Reinhardt  
521 C, Perner S, Heukamp L, Buttner R, Haas SA, Brambilla E, Peifer M, Sage J, Thomas RK.  
522 Comprehensive genomic profiles of small cell lung cancer. *Nature.* 2015;524(7563):47-53. doi:  
523 10.1038/nature14664
- 524 29. Oudin MJ, Gajendra S, Williams G, Hobbs C, Lalli G, Doherty P. Endocannabinoids  
525 regulate the migration of subventricular zone-derived neuroblasts in the postnatal brain. *J*  
526 *Neurosci.* 2011;31(11):4000-11. doi: 10.1523/JNEUROSCI.5483-10.2011
- 527 30. Lois C, Garcia-Verdugo JM, Alvarez-Buylla A. Chain migration of neuronal precursors.  
528 *Science.* 1996;271(5251):978-81
- 529 31. Zhou Y, Oudin MJ, Gajendra S, Sonogo M, Falenta K, Williams G, Lalli G, Doherty P.  
530 Regional effects of endocannabinoid, BDNF and FGF receptor signalling on neuroblast motility  
531 and guidance along the rostral migratory stream. *Mol Cell Neurosci.* 2015;64:32-43. doi:  
532 10.1016/j.mcn.2014.12.001
- 533 32. Shibue T, Brooks MW, Inan MF, Reinhardt F, Weinberg RA. The outgrowth of  
534 micrometastases is enabled by the formation of filopodium-like protrusions. *Cancer discovery.*  
535 2012;2(8):706-21
- 536 33. Wingrove E, Liu ZZ, Patel KD, Arnal-Estape A, Cai WL, Melnick MA, Politi K,  
537 Monteiro C, Zhu L, Valiente M, Kluger HM, Chiang VL, Nguyen DX. Transcriptomic  
538 Hallmarks of Tumor Plasticity and Stromal Interactions in Brain Metastasis. *Cell reports.*  
539 2019;27(4):1277-92 e7. doi: 10.1016/j.celrep.2019.03.085
- 540 34. Lukas RV, Gondi V, Kamson DO, Kumthekar P, Salgia R. State-of-the-art considerations  
541 in small cell lung cancer brain metastases. *Oncotarget.* 2017. doi: 10.18632/oncotarget.19333
- 542 35. Guo N-h, Templeton NS, Al-Barazi H, Cashel J, Sipes JM, Krutzsch HC, Roberts DD.  
543 Thrombospondin-1 promotes  $\alpha 3 \beta 1$  integrin-mediated adhesion and neurite-like outgrowth and  
544 inhibits proliferation of small cell lung carcinoma cells. *Cancer research.* 2000;60(2):457-66
- 545 36. Burger M, Glodek A, Hartmann T, Schmitt-Graff A, Silberstein LE, Fujii N, Kipps TJ,  
546 Burger JA. Functional expression of CXCR4 (CD184) on small-cell lung cancer cells mediates

- 547 migration, integrin activation, and adhesion to stromal cells. *Oncogene*. 2003;22(50):8093-101.  
548 Epub 2003/11/07. doi: 10.1038/sj.onc.1207097
- 549 37. Teicher BA. Targets in small cell lung cancer. *Biochem Pharmacol*. 2014;87(2):211-9.  
550 doi: 10.1016/j.bcp.2013.09.014
- 551 38. Taromi S, Kayser G, Catusse J, von Elverfeldt D, Reichardt W, Braun F, Weber WA,  
552 Zeiser R, Burger M. CXCR4 antagonists suppress small cell lung cancer progression.  
553 *Oncotarget*. 2016;7(51):85185
- 554 39. Salgia R, Stille JR, Weaver RW, McCleod M, Hamid O, Polzer J, Roberson S, Flynt A,  
555 Spigel DR. A randomized phase II study of LY2510924 and carboplatin/etoposide versus  
556 carboplatin/etoposide in extensive-disease small cell lung cancer. *Lung Cancer*. 2017;105:7-13
- 557 40. Yuan S, Norgard RJ, Stanger BZ. Cellular Plasticity in Cancer. *Cancer Discov*. 2019. doi:  
558 10.1158/2159-8290.CD-19-0015
- 559 41. Allison Stewart C, Tong P, Cardnell RJ, Sen T, Li L, Gay CM, Masrorpour F, Fan Y,  
560 Bara RO, Feng Y, Ru Y, Fujimoto J, Kundu ST, Post LE, Yu K, Shen Y, Glisson BS, Wistuba I,  
561 Heymach JV, Gibbons DL, Wang J, Byers LA. Dynamic variations in epithelial-to-mesenchymal  
562 transition (EMT), ATM, and SLFN11 govern response to PARP inhibitors and cisplatin in small  
563 cell lung cancer. *Oncotarget*. 2017;8(17):28575-87. doi: 10.18632/oncotarget.15338
- 564 42. Krohn A, Ahrens T, Yalcin A, Plones T, Wehrle J, Taromi S, Wollner S, Follo M,  
565 Brabletz T, Mani SA, Claus R, Hackanson B, Burger M. Tumor Cell Heterogeneity in Small Cell  
566 Lung Cancer (SCLC): Phenotypical and Functional Differences Associated with Epithelial-  
567 Mesenchymal Transition (EMT) and DNA Methylation Changes. *PLoS One*. 2014;9(6):e100249.  
568 Epub 2014/06/25. doi: 10.1371/journal.pone.0100249
- 569 43. Canadas I, Rojo F, Taus A, Arpi O, Arumi-Uria M, Pijuan L, Menendez S, Zazo S,  
570 Domine M, Salido M, Mojal S, Garcia de Herreros A, Rovira A, Albanell J, Arriola E. Targeting  
571 epithelial-to-mesenchymal transition with Met inhibitors reverts chemoresistance in small cell  
572 lung cancer. *Clin Cancer Res*. 2014;20(4):938-50. doi: 10.1158/1078-0432.CCR-13-1330
- 573 44. O'Brien-Ball C, Biddle A. Reprogramming to developmental plasticity in cancer stem  
574 cells. *Dev Biol*. 2017. doi: 10.1016/j.ydbio.2017.07.025
- 575 45. Singh A, Settleman J. EMT, cancer stem cells and drug resistance: an emerging axis of  
576 evil in the war on cancer. *Oncogene*. 2010;29(34):4741-51. Epub 2010/06/10. doi:  
577 10.1038/onc.2010.215
- 578 46. Williamson SC, Metcalf RL, Trapani F, Mohan S, Antonello J, Abbott B, Leong HS,  
579 Chester CP, Simms N, Polanski R, Nonaka D, Priest L, Fusi A, Carlsson F, Carlsson A, Hendrix  
580 MJ, Seftor RE, Seftor EA, Rothwell DG, Hughes A, Hicks J, Miller C, Kuhn P, Brady G,  
581 Simpson KL, Blackhall FH, Dive C. Vasculogenic mimicry in small cell lung cancer. *Nat*  
582 *Commun*. 2016;7:13322. doi: 10.1038/ncomms13322
- 583 47. Lim JS, Ibaseta A, Fischer MM, Cancilla B, O'Young G, Cristea S, Luca VC, Yang D,  
584 Jahchan NS, Hamard C, Antoine M, Wislez M, Kong C, Cain J, Liu YW, Kapoun AM, Garcia  
585 KC, Hoey T, Murriel CL, Sage J. Intratumoural heterogeneity generated by Notch signalling  
586 promotes small-cell lung cancer. *Nature*. 2017;545(7654):360-4. doi: 10.1038/nature22323



- 587 48. Muzumdar MD, Tasic B, Miyamichi K, Li L, Luo L. A global double-fluorescent Cre  
588 reporter mouse. *Genesis*. 2007;45(9):593-605. Epub 2007/09/18. doi: 10.1002/dvg.20335
- 589 49. DuPage M, Dooley AL, Jacks T. Conditional mouse lung cancer models using adenoviral  
590 or lentiviral delivery of Cre recombinase. *Nat Protoc*. 2009;4(7):1064-72. Epub 2009/06/30. doi:  
591 10.1038/nprot.2009.95
- 592 50. Jahchan NS, Dudley JT, Mazur PK, Flores N, Yang D, Palmerton A, Zmoos AF, Vaka D,  
593 Tran KQ, Zhou M, Krasinska K, Riess JW, Neal JW, Khatri P, Park KS, Butte AJ, Sage J. A  
594 drug repositioning approach identifies tricyclic antidepressants as inhibitors of small cell lung  
595 cancer and other neuroendocrine tumors. *Cancer Discov*. 2013;3(12):1364-77. doi:  
596 10.1158/2159-8290.CD-13-0183
- 597 51. Leong TL, Marini KD, Rossello FJ, Jayasekara SN, Russell PA, Prodanovic Z, Kumar B,  
598 Ganju V, Alamgeer M, Irving LB, Steinfort DP, Peacock CD, Cain JE, Szczepny A, Watkins  
599 DN. Genomic characterisation of small cell lung cancer patient-derived xenografts generated  
600 from endobronchial ultrasound-guided transbronchial needle aspiration specimens. *PLoS One*.  
601 2014;9(9):e106862. Epub 2014/09/06. doi: 10.1371/journal.pone.0106862
- 602 52. Susaki EA, Tainaka K, Perrin D, Yukinaga H, Kuno A, Ueda HR. Advanced CUBIC  
603 protocols for whole-brain and whole-body clearing and imaging. *Nature protocols*.  
604 2015;10(11):1709
- 605 53. Zhou Y, Zhou B, Pache L, Chang M, Khodabakhshi AH, Tanaseichuk O, Benner C,  
606 Chanda SK. Metascape provides a biologist-oriented resource for the analysis of systems-level  
607 datasets. *Nature communications*. 2019;10(1):1523
- 608 54. Szklarczyk D, Gable AL, Lyon D, Junge A, Wyder S, Huerta-Cepas J, Simonovic M,  
609 Doncheva NT, Morris JH, Bork P. STRING v11: protein-protein association networks with  
610 increased coverage, supporting functional discovery in genome-wide experimental datasets.  
611 *Nucleic acids research*. 2018;47(D1):D607-D13
- 612 55. Tsherniak A, Vazquez F, Montgomery PG, Weir BA, Kryukov G, Cowley GS, Gill S,  
613 Harrington WF, Pantel S, Krill-Burger JM, Meyers RM, Ali L, Goodale A, Lee Y, Jiang G,  
614 Hsiao J, Gerath WFJ, Howell S, Merkel E, Ghandi M, Garraway LA, Root DE, Golub TR,  
615 Boehm JS, Hahn WC. Defining a Cancer Dependency Map. *Cell*. 2017;170(3):564-76 e16. doi:  
616 10.1016/j.cell.2017.06.010

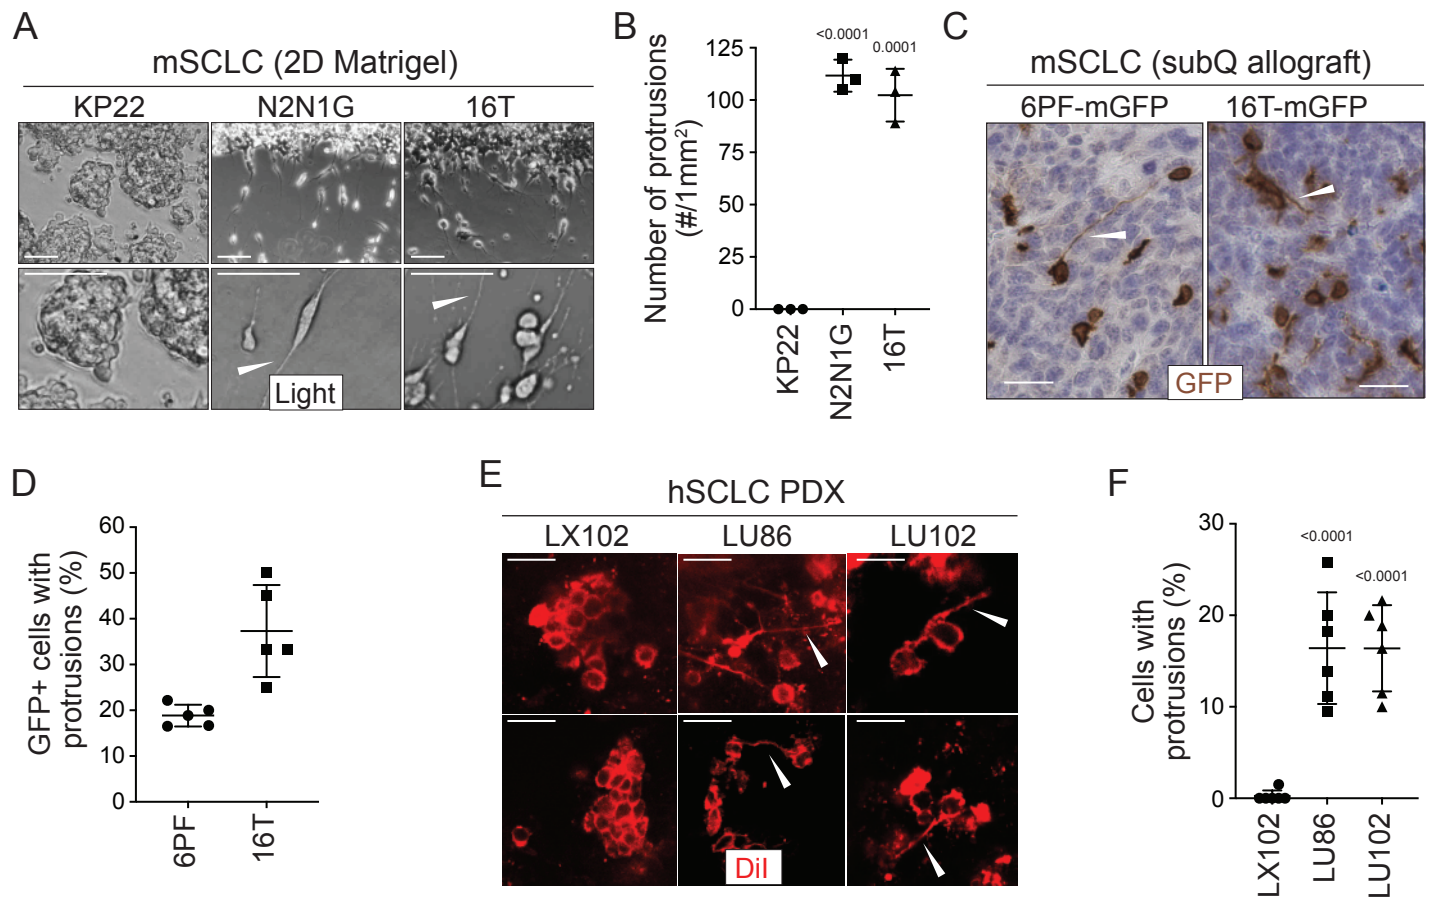

**Figure 1: SCLC cells grow protrusions in culture and *in vivo***

A. Representative bright field images of three mouse SCLC (mSCLC) cell lines (KP22, N2N1G, and 16T). Cells extend protrusions into a cell-free scratch generated in monolayer cultures. Protrusions are shown with white arrowheads. Scale bars, 100  $\mu$ m. N=3 replicates.

B. Quantification of the number of protrusions that form from each mSCLC cell line as cultured in (A). Each symbol corresponds to the average of two technical replicates of an independent experiment. Mean  $\pm$  s.d. is shown, unpaired t-test.

C. Representative images of mSCLC cells (6PF and 16T) growing as subcutaneous tumors. At the time of injection, 10% SCLC cells stably expressing membrane-GFP (mGFP) were mixed with 90% GFP-negative SCLC cells. Immunostaining for GFP generates a brown signal. Examples of protrusions are shown with white arrowheads. Hematoxylin (blue) stains the nuclei of the cells. (N=5/allograft, from one biological replicate). Scale bar, 20  $\mu$ m.

D. Quantification of (C). Each symbol represents an allograft tumor (N=4/allograft, from one biological replicate). Mean  $\pm$  s.d. is shown.

E. Representative images of human SCLC (hSCLC) patient derived xenografts growing subcutaneously (LX102, LU86, and LU102 models). Tumors were injected with the red fluorescent tracer Dil. Protrusions are shown with white arrowheads. Scale bar, 20  $\mu$ m.

F. Quantification of (E). Each symbol represents a xenograft tumor (N=6/xenograft, from one biological replicate). Mean  $\pm$  s.d. is shown, unpaired t-test.

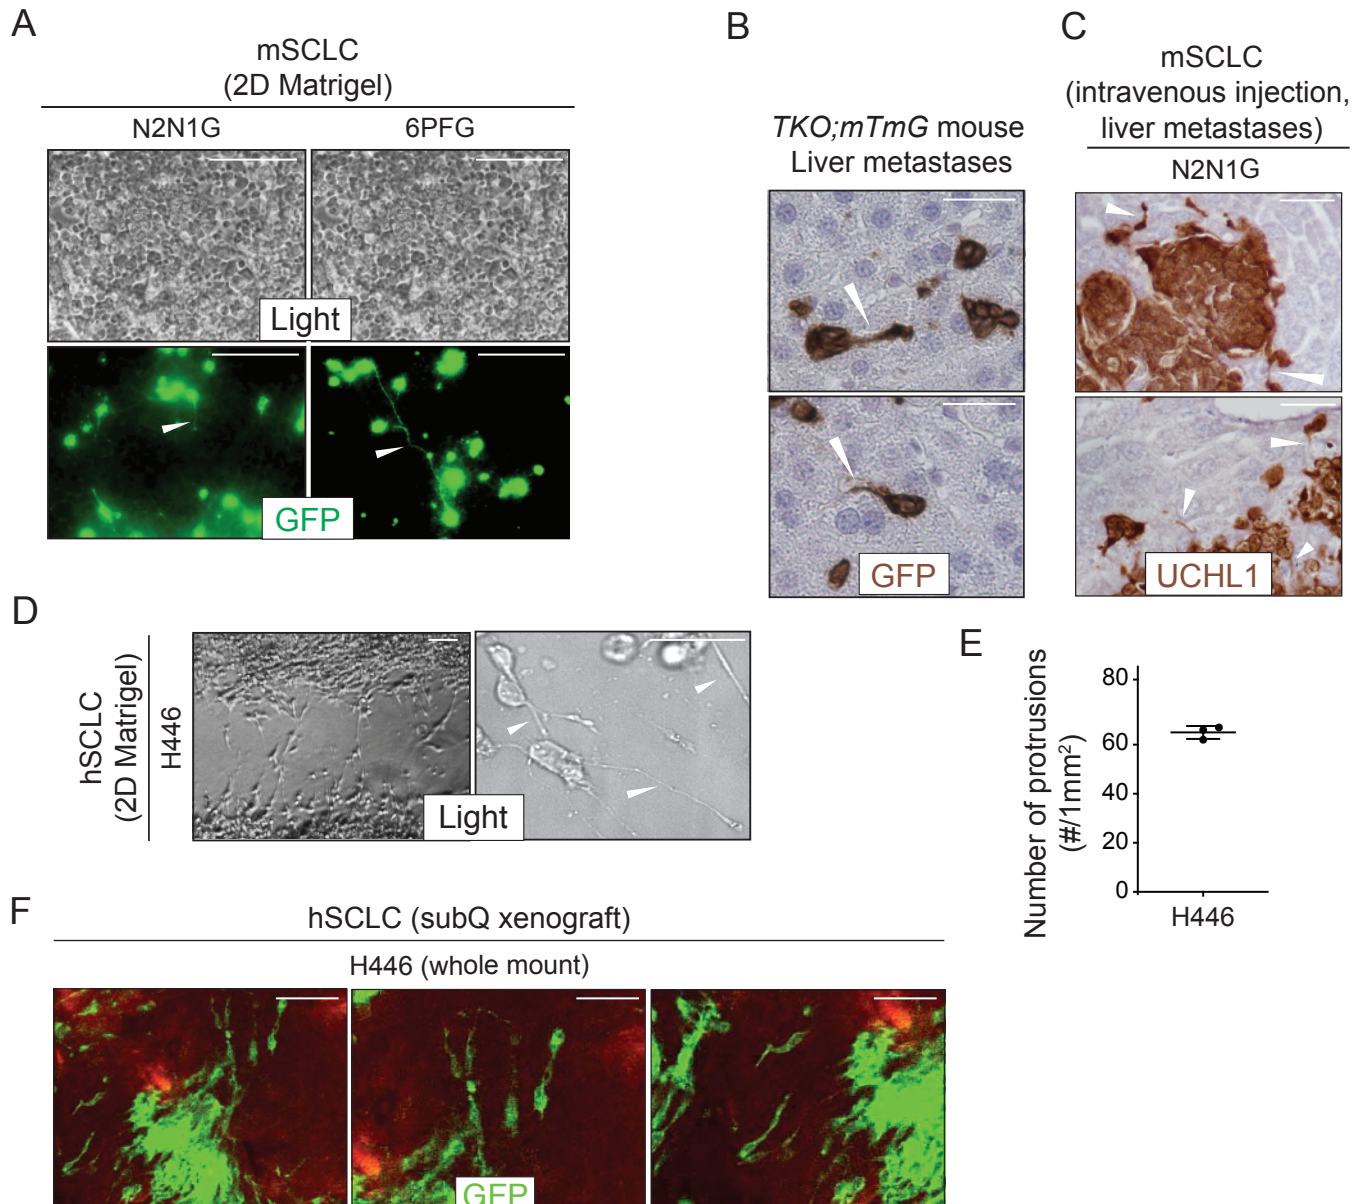

**Figure S1 (related to Figure 1): SCLC cells grow protrusions in culture and *in vivo***

A. Representative images of mSCLC N2N1G and 6PFG cells growing in dense culture from N=3 independent experiments. At the time of plating, 3-5% cells expressing membrane-GFP (mGFP, green fluorescence) were mixed and co-cultured with 95-97% SCLC cells that do not expressing GFP. Examples of protrusions are shown with white arrowheads. Scale bars, 100  $\mu$ m.

B. Representative images of mSCLC cells in the liver from the autochthonous *TKO;mTmG* model from N= 2 mice . Images were taken from micro-metastases. Immunostaining for GFP generates a brown signal. Protrusions are shown with white arrowheads. Hematoxylin (blue) stains the nucleus of cells. Scale bar, 20  $\mu$ m.

C. Representative images of liver sections from mice after intravenous injection of mSCLC N2N1G cells from N=3 mice. Immunostaining for the neuroendocrine marker UCHL1 (brown) outlines the shape of cells. Protrusions are shown with white arrowheads. Scale bars, 50  $\mu$ m.

D. Representative bright field images of human SCLC (hSCLC) NCI-H446 cells when cells are allowed to grow into a cell-free scratch generated in monolayer cultures under Matrigel. Protrusions are shown with white arrowheads. Scale bars, 40  $\mu$ m.

E. Quantification of (D). N=3 independent experiments. Mean +/- s.d. is shown.

F. Representative whole mount images of hSCLC NCI-H446 cells growing as a subcutaneous tumor from N=4 independent xenografts from one experiment. At the time of injection, 10% of the SCLC H446 cells expressing membrane-GFP (mGFP) were mixed with 90% SCLC H446 cells not expressing GFP. Scale bars, 100  $\mu$ m.



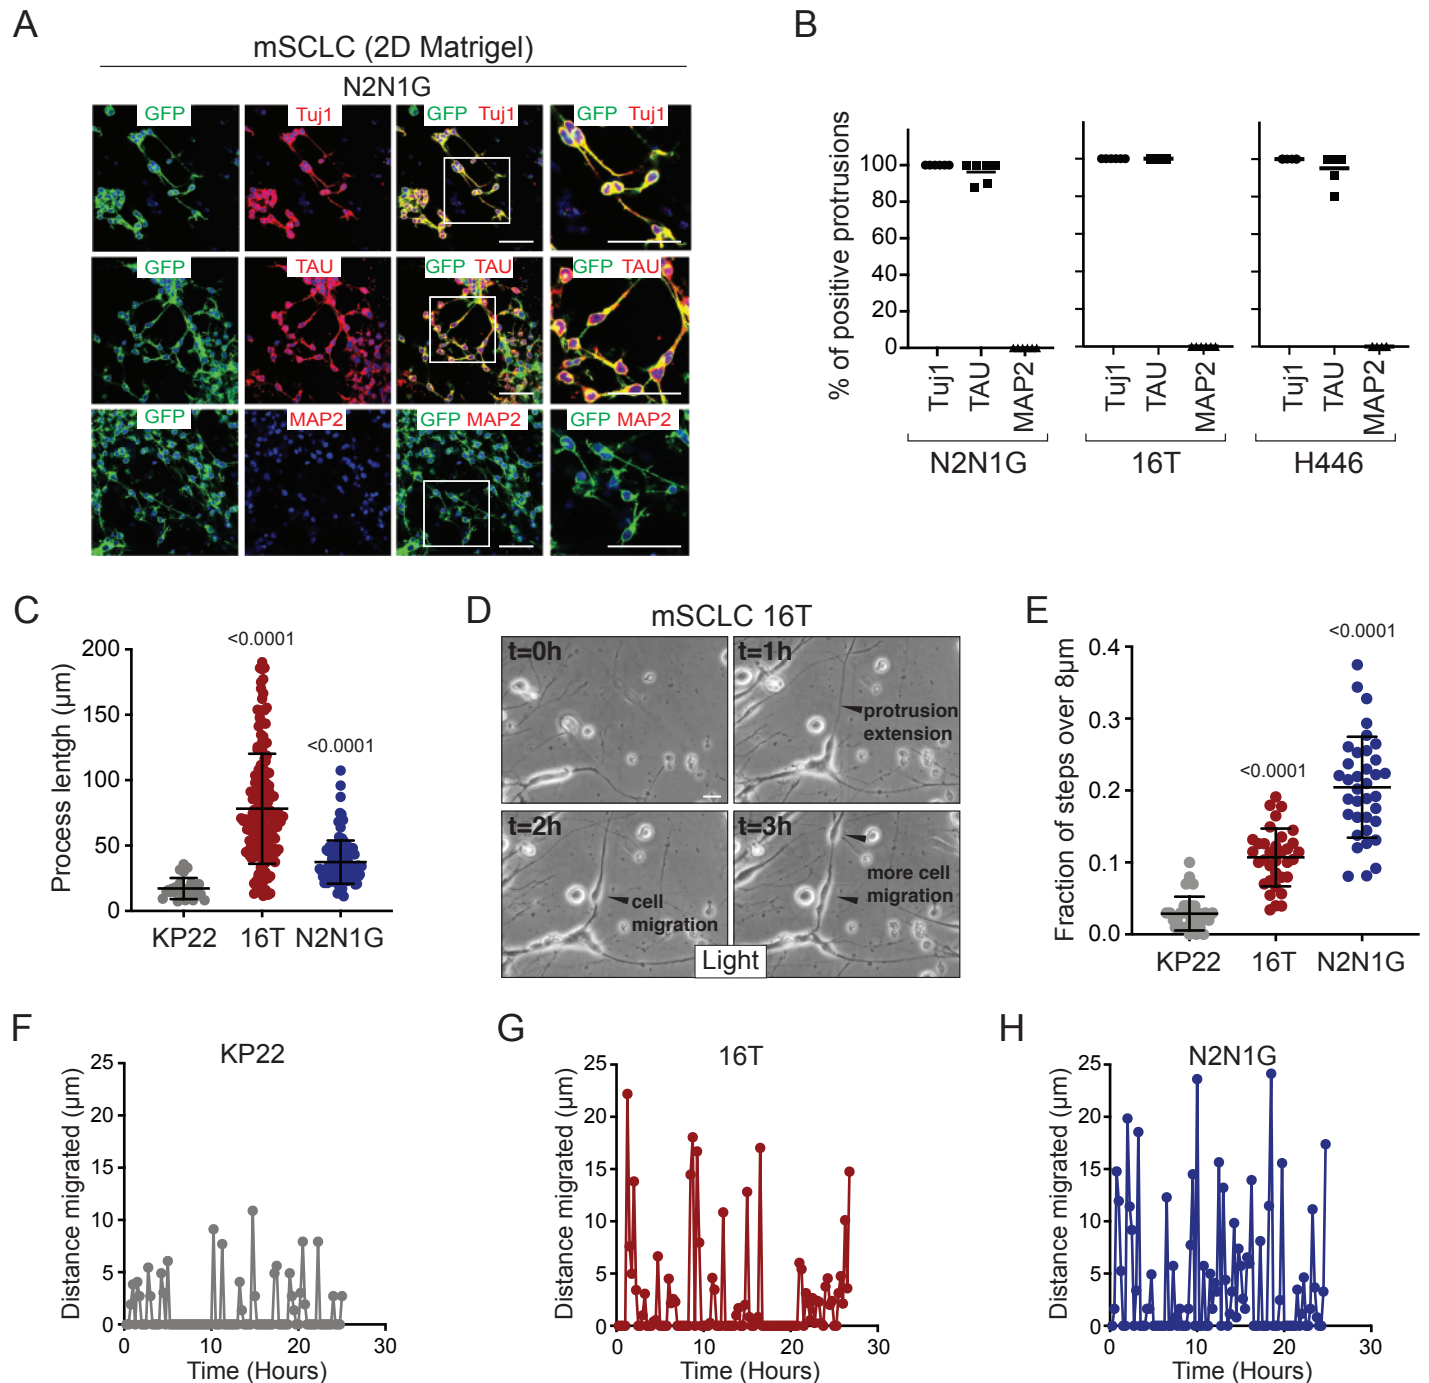

**Figure 2: SCLC cells with protrusions migrate in a saltatory fashion similar to neuroblasts**

A. Representative immunofluorescence images of N2N1G mSCLC cells expressing membrane-GFP (GFP, green) and stained (red) for expression of the neuronal marker Tuj1, the axonal marker TAU, or the dendritic marker MAP2. DAPI marks the nucleus of cells in blue. Scale bars, 50  $\mu\text{m}$ .

B. Quantification of (A) for two mouse SCLC cell lines (16T, N2N1G) and one human SCLC cell line (H446). Images for 16T and H446 are shown in Figure S2B-C.  $N=5$ /cell line. The bar is the mean.

C. Quantification of the length of protrusions in three mSCLC cell lines (KP22, no visible protrusions, 16T and N2N1G with protrusions). The average cell size in these experiments was  $\sim 8 \mu\text{m}$ . Each dot represents a cell.  $N>10$  fields were quantified in one biological replicate. Mean  $\pm$  s.d. is shown, Mann-Whitney test.

D. Representative still images from time-lapse videomicroscopy analysis of 16T SCLC cells showing the dynamic nature of the protrusions (from Movie S1).

E. Quantification of the saltatory movements of three mSCLC cell lines as indicated. Note the correlation between the presence of protrusions and the ability of making longer steps (longer than the average cell size). Each dot represents a cell.  $N>10$  fields were quantified in one biological replicate. Mean  $\pm$  s.d. is shown, Mann-Whitney test.

F-H. Example of single cell movement over time for each of the three mSCLC cell lines.

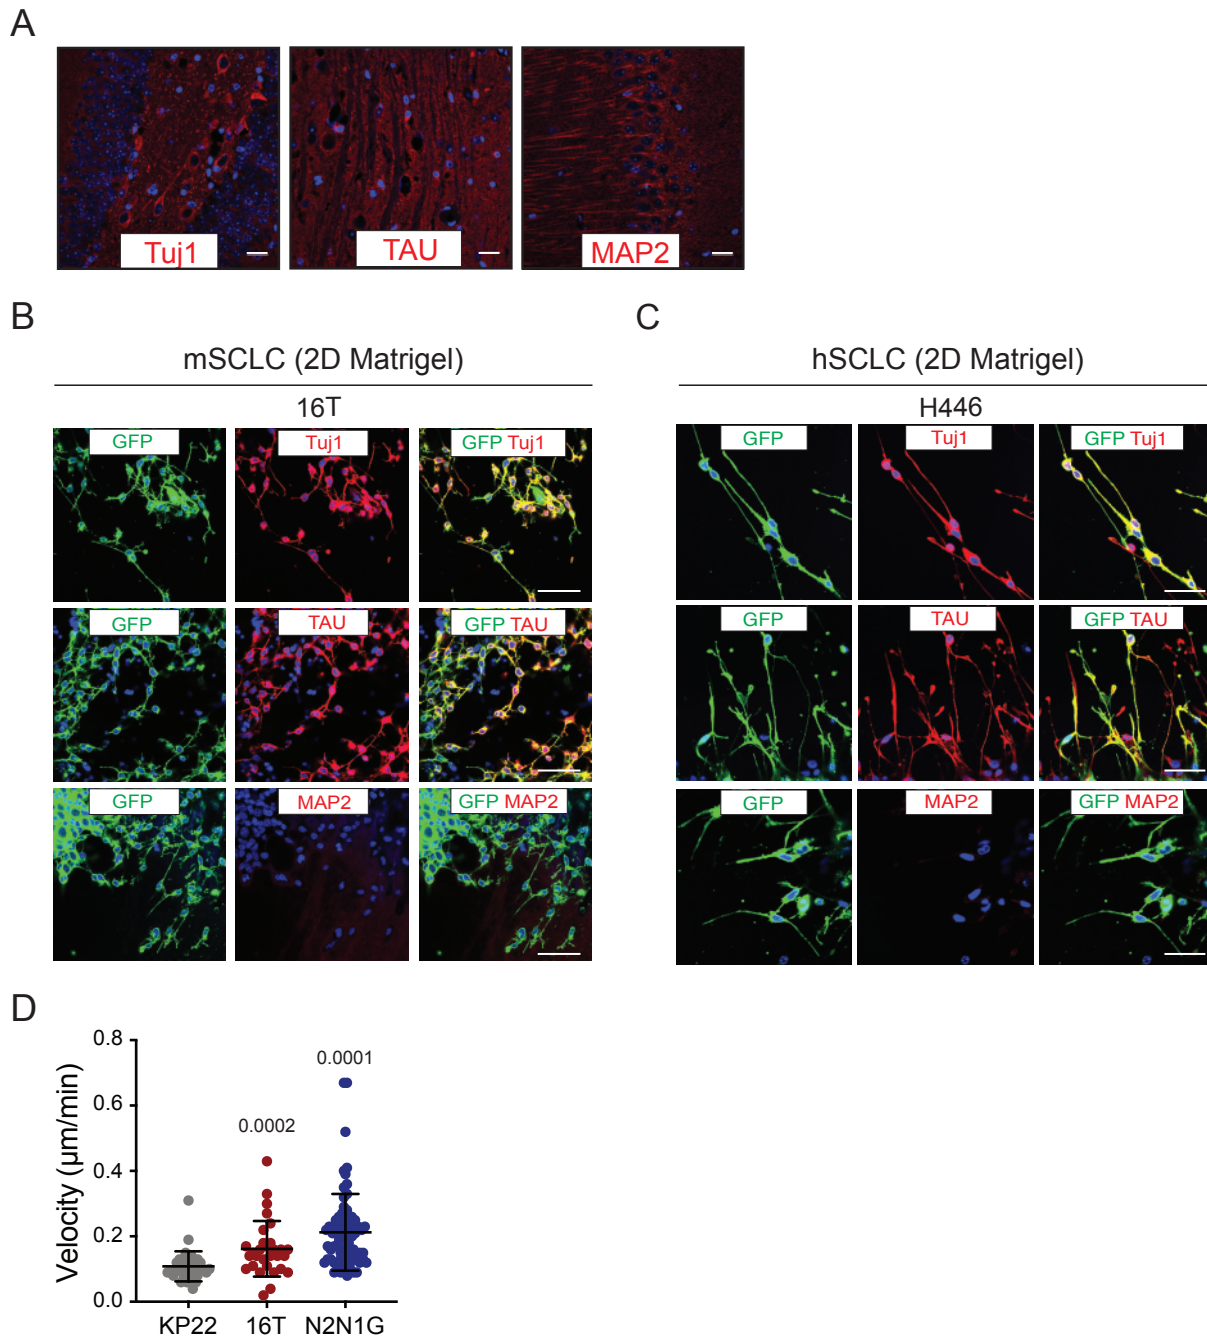

**Figure S2 (related to Figure 2): SCLC protrusions resemble axons and enable rapid cell movement**

A. Representative fluorescence images of a mouse brain section stained with Tuj1, TAU, and MAP2 antibodies (positive controls, red). DAPI marks the nuclei of cells in blue. Scale bars, 50 µm.

B-C. Representative fluorescence images of 16T mSCLC cells (B) and NCI-H446 hSCLC cells (C) expressing membrane-GFP (mGFP) and stained (red) for expression of the neuronal marker Tuj1, the axonal marker TAU, or the dendritic marker MAP2. DAPI marks the nucleus of cells in blue. Quantification is shown in Figure 2B. Scale bars, 50 µm.

D. Quantification of velocity of mSCLC cancer cells from the three mouse SCLC cell lines indicated. Each dot represents a cell. Mean +/- s.d. is shown, Mann-Whitney test.

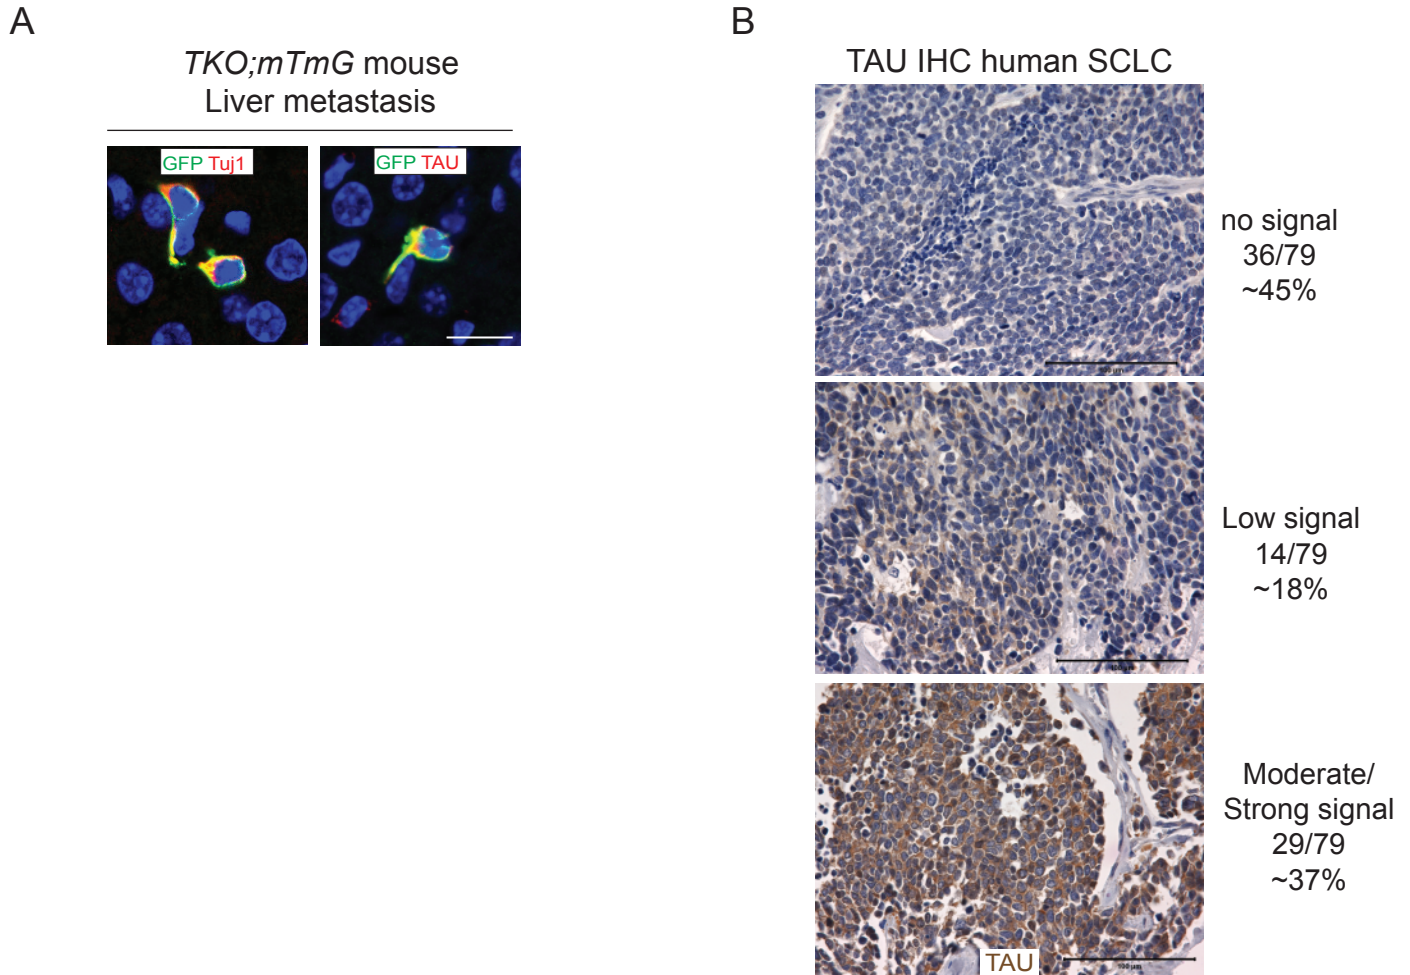

**Figure S3 (related to Figure 2): Mouse and human SCLC cells express axonal markers *in vivo***

A. Representative immunofluorescence staining of SCLC cells in the liver of a *TKO;mTmG* mouse (in which SCLC cancer cells express membrane GFP (GFP)). These cancer cells have protrusions positive for TAU and Tuj1. Images represent a merge of the GFP signal (green) and the signal for the TAU or Tuj1 antibodies (red). The nucleus of cells is labeled in blue by DAPI. Scale bar, 20  $\mu$ m.

B. Representative images of immunohistochemistry (IHC) for TAU (brown) on human SCLC tissue microarrays (N=79 human samples analyzed). The signal was evaluated by a certified pathologist (K.C.). Scale bars, 100  $\mu$ m.

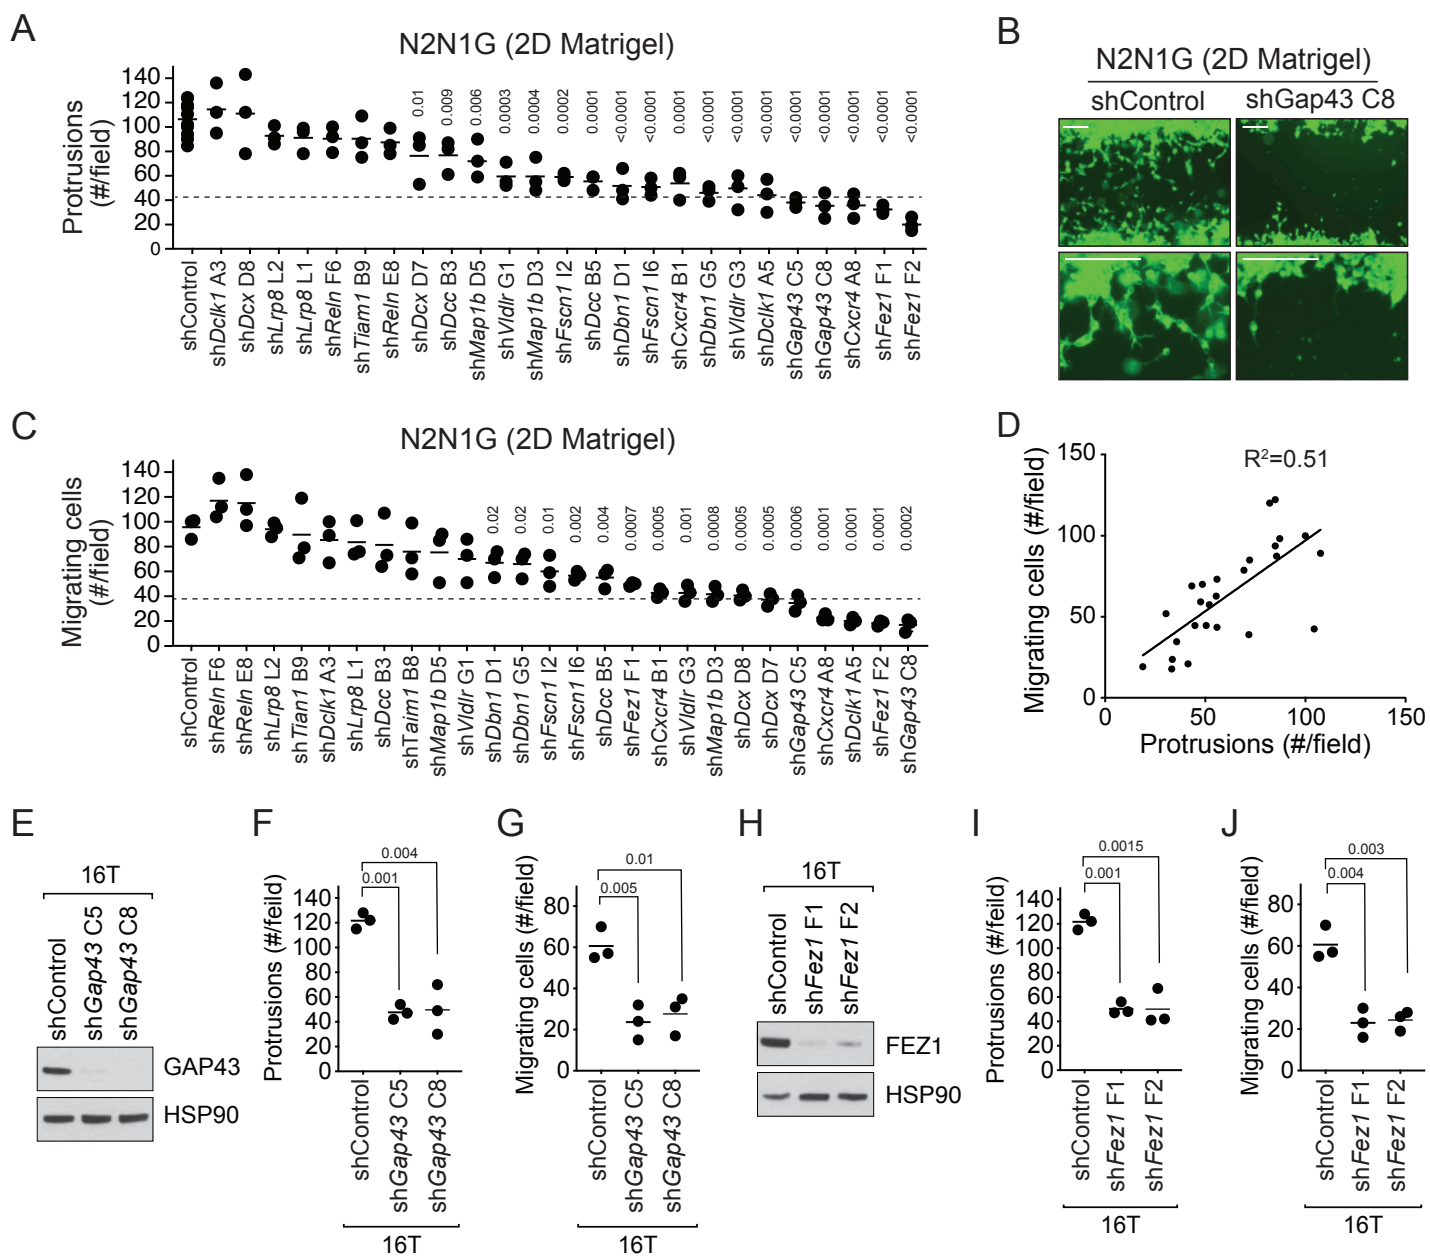

**Figure 3: The axonal-like protrusions contribute to the migratory ability of SCLC cells in culture**

A. Quantification of the number of cells with protrusions when mGFP-labeled N2N1G mSCLC cells were allowed to grow into a cell-free scratch generated in monolayer cultures under Matrigel. N=3 independent experiments (shControl, N=3 per experiment, total N=9 plotted together). An unpaired t-test was used for statistical analysis and p-values are shown. Only significant p-values are shown. The dotted line represents a 60% reduction compared to the mean value of the controls.

B. Representative images of the data quantified in (A) and (C) with knock-down of *Gap43*. Scale bars, 100  $\mu$ m.

C. Quantification of the migration of cells with protrusions when mGFP-labeled N2N1G mSCLC cells were allowed to grow into a cell-free scratch generated in monolayer cultures under Matrigel. N=3 independent experiments. An unpaired t-test was used for statistical analysis and p-values are shown. Only significant p-values are shown. The dotted line represents a 60% reduction compared to the mean value of the controls.

D. Correlation of the data in (A) and (C) using the mean value for each knock-down. Pearson correlation  $R^2$  value is shown.

E and H. Immunoblot analysis of GAP43 or FEZ1 levels, respectively, in control and knock-down 16T mSCLC cells. HSP90 is a loading control.

F and I. Quantification of the number of cells with protrusions as in (A) with 16T mSCLC cells and *Gap43* or *Fez1* knock-down, respectively (N=3). An unpaired t-test was used for statistical analysis and p-values are shown.

G and J. Quantification of the migration of cells with protrusions as in (B) with 16T mSCLC cells and *Gap43* or *Fez1* knock-down, respectively (N=3). An unpaired t-test was used for statistical analysis and p-values are shown.



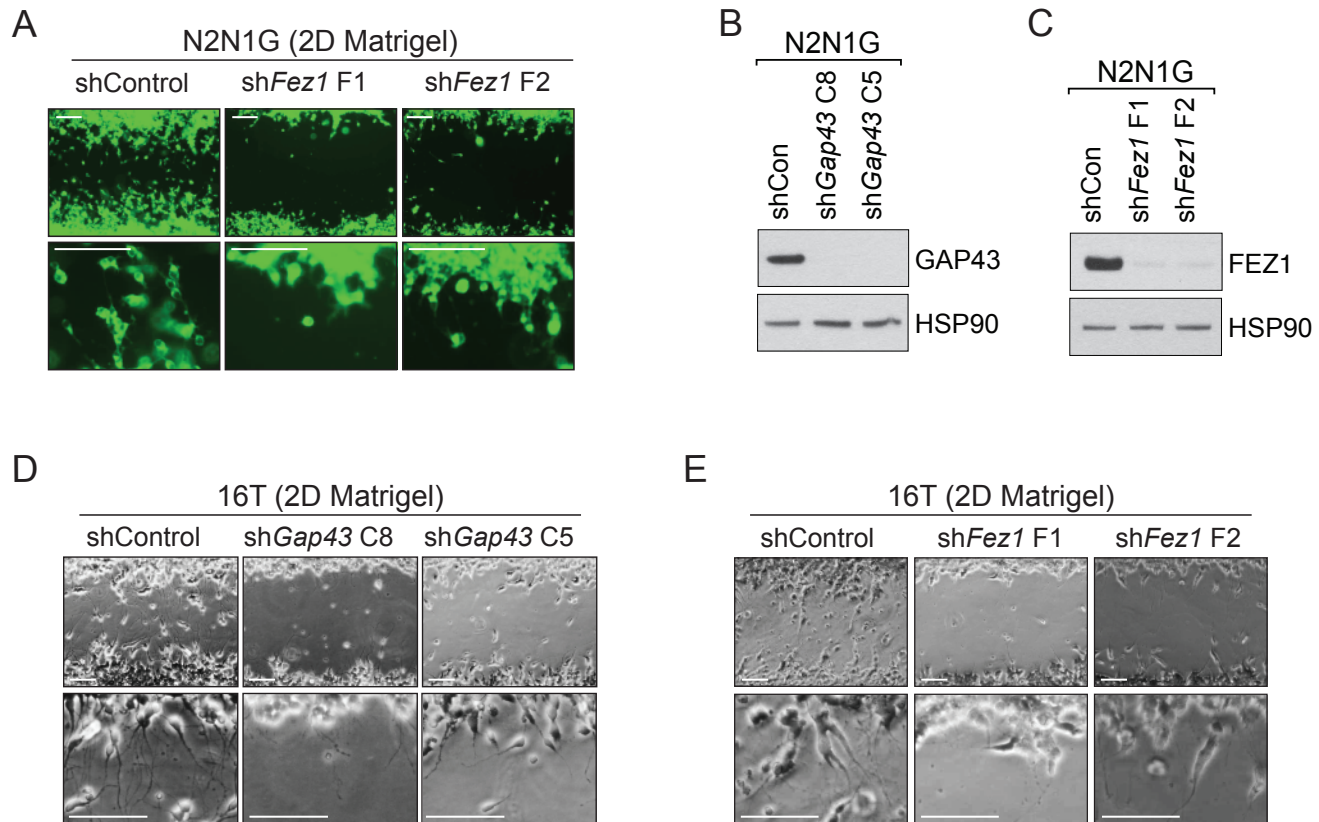

**Figure S5 (related to Figure 3): Knock-down of GAP43 and FEZ1 disrupts the formation of protrusions and cell migration in mouse SCLC cell lines in culture**

A. Representative images of the data quantified in Figure 3A and 3C with knock-down of *Fez1*. Scale bars, 100  $\mu$ m.

B-C. Immunoblot analysis of GAP43 (B) or FEZ1 (C) levels in control and knock-down N2N1G mSCLC cells. HSP90 is a loading control.

D-E. Representative images of the data with knock-down of *Gap43* (D) or *Fez1* (E) in 16T cells. These data are quantified in Figure 3F-G (for GAP43) and Figure 3I-J (for FEZ1). The shControl targets GFP. Scale bars, 100  $\mu$ m.

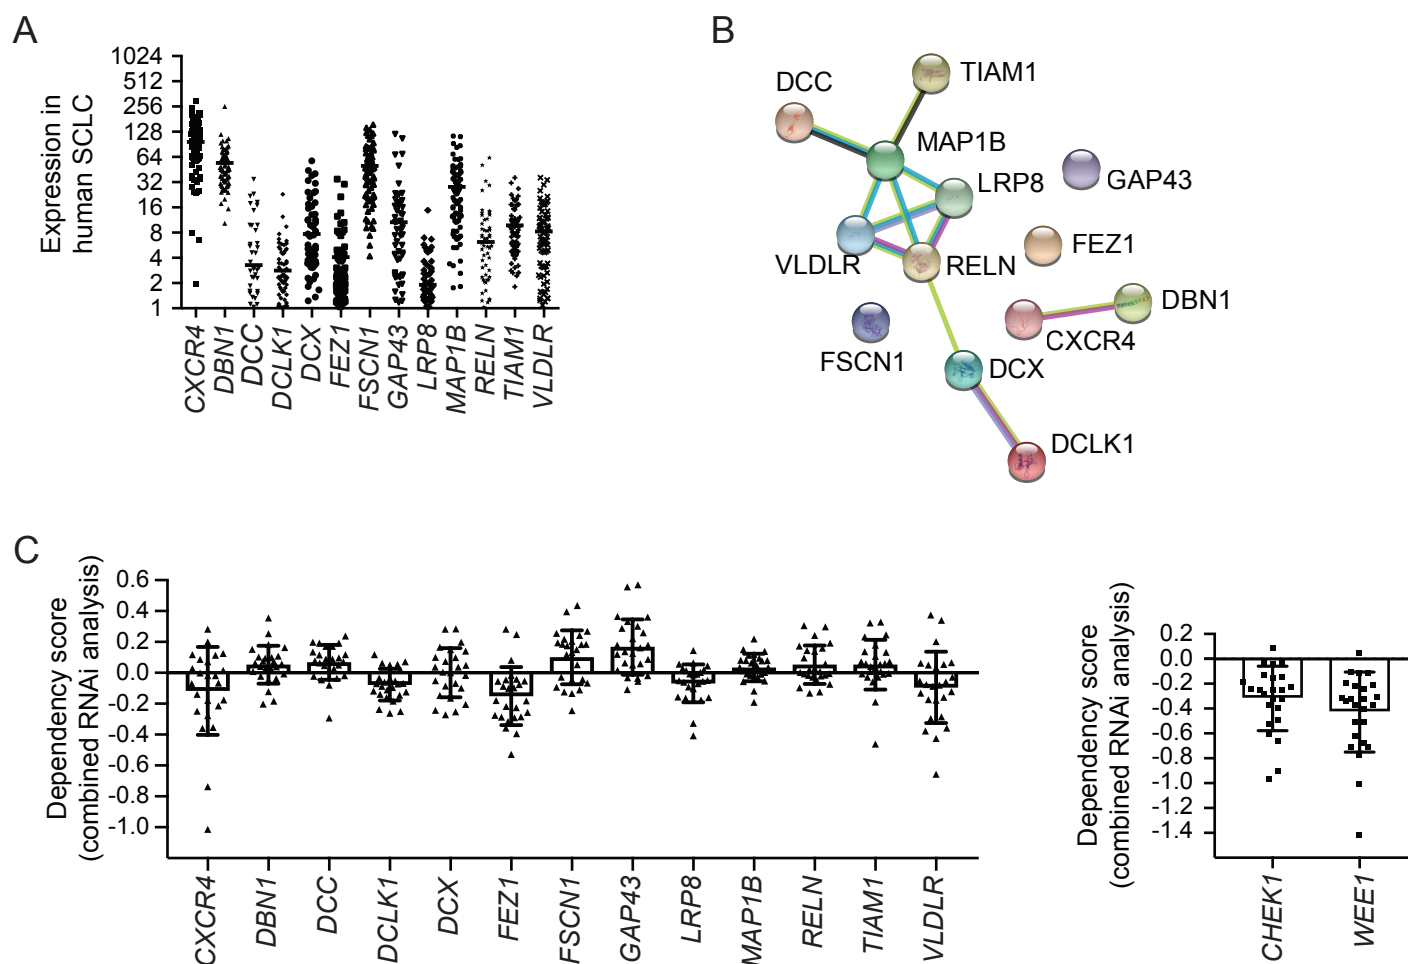

**Figure S4 (related to Figure 3): The 13 genes selected for their possible role in the formation of protrusions are expressed in human SCLC but do not play a key role in the expansion of SCLC cell populations**

A. mRNA levels of candidate genes in human primary SCLC tumors (RNA-seq from George, Lim *et al.*, Nature, 2015).

B. Network representation of the 13 candidates. Edges in the STRING analysis represent protein-protein associations but do not necessarily mean that they physically bind to each other. Blue edges represent known interactions from curated databases. Pink edges represent known experimentally-validated interactions. Others are predicted interactions, including text mining and co-expression (see string-db.org).

C. DepMap analysis (depmap.org) of the requirement for the 13 candidate genes in 25 human SCLC cell lines (RNAi combined analysis). Note that in a number of cell lines, the knock-down of candidate genes results in a positive score, indicative of a better expansion upon knock-down. Even in cases where the scores are negative, the negative values are small (the data for the genes coding for the CHK1 and WEE1 kinases, which are considered therapeutic targets in SCLC, are shown on the right hand side).

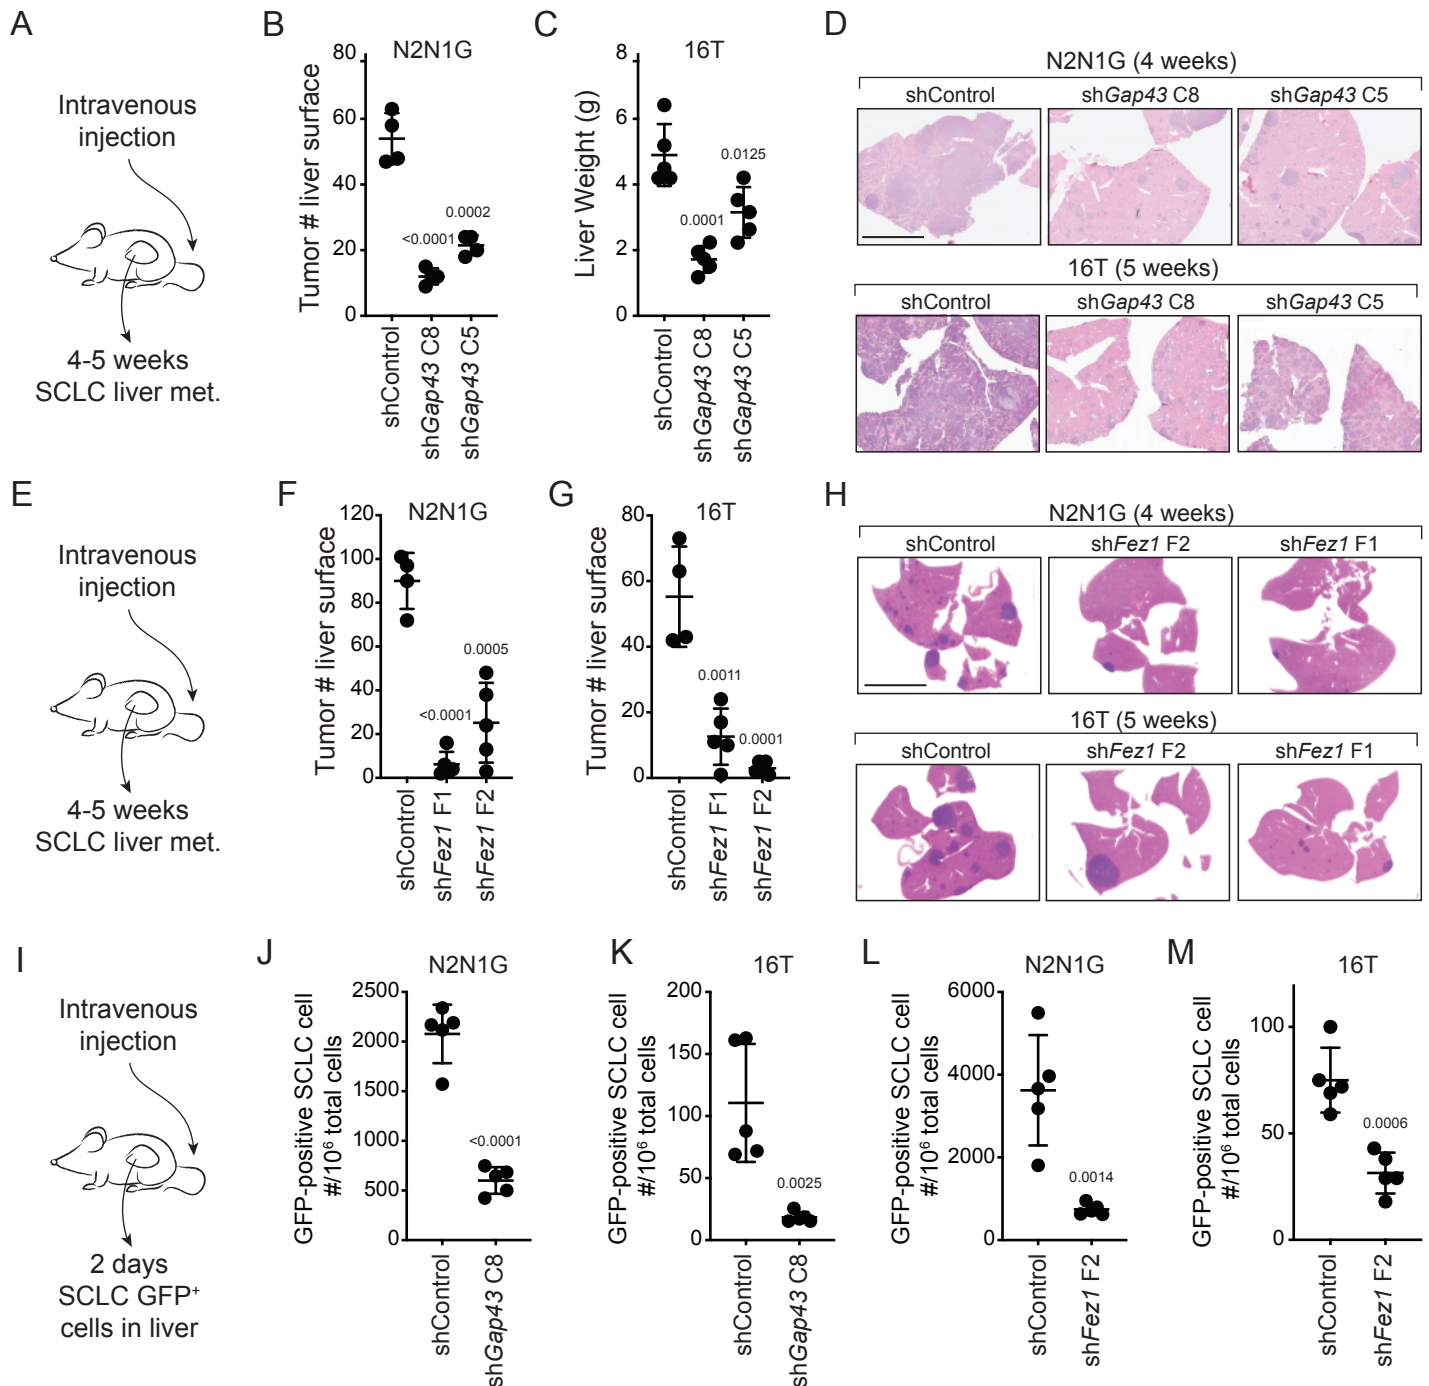

**Figure 4: Genes involved in the generation of protrusions also control the formation of metastases**

A. Diagram of the approach to investigate the formation of liver metastases (met.) after intravenous injection of SCLC cells.

B-C. Quantification of the number of metastases 4 and 5 weeks after intravenous injection of N2N1G and 16T mSCLC cells, respectively, with control knock-down or knock-down of *Gap43* with two independent shRNAs. For N2N1G, tumors at the surface of the liver were quantified on the liver surface, as shown in Supplementary Figure S7D. Too many tumors were present with the 16T cell line and the control shRNA and quantification was thus performed by measuring liver weight. N=4-5 mice per condition in one biological replicate. Mean +/- s.d. unpaired t-test.

D. Representative hematoxylin and eosin (H&E) images of liver sections of mice in (B-C). Scale bars, 5 mm.

E-H. As shown in (A-D) for *Fez1* knock-down. See Supplementary Figure S7E for representative images with N2N1G cells for the quantification in (F-G) of tumors at the surface of the liver. N=4-5 mice per condition in one biological replicate. Mean +/- s.d. is shown, unpaired t-test.

I. Diagram of the approach to investigate early steps in liver metastasis, 2 days after intravenous injection.

J-M. Quantification of the number of GFP<sup>positive</sup> (GFP<sup>+</sup>) N2N1G and 16T mSCLC cells 2 days after intravenous injection. See Supplementary Figure S7F-I for representative flow cytometry. N=5 mice per condition in one biological replicate. Mean +/- s.d., unpaired t-test.

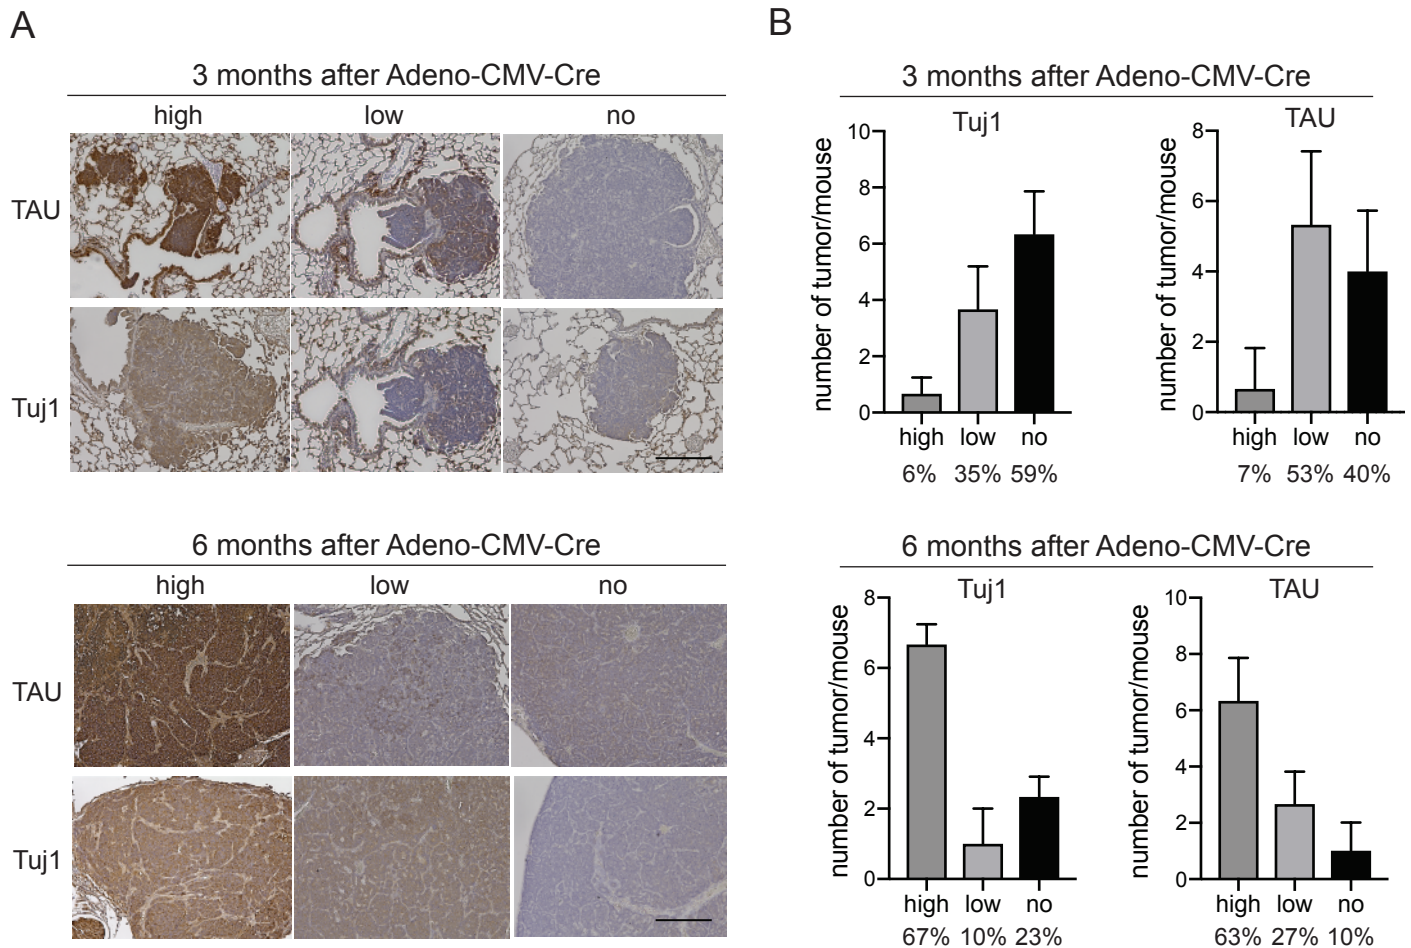

**Figure S6 (related to Figure 4): Increased expression of the axonal marker TAU in metastatic SCLC in the *TKO* mouse model**

A. Representative images of immunohistochemistry experiments on lung sections from *TKO* mice 3 months and 6 months after SCLC initiation with Ad-CMV-Cre. None of the mice had metastases at the 3-month time point while all the mice analyzed had evidence of metastasis at the 6-month time point. The Tuj1 antibody marks neuronal tubulin and TAU is a marker of axons. Hematoxylin was used as a counterstain (purple). Scale bar, 100  $\mu$ m.

B. Quantification of (A), with N=30-32 tumors analyzed from N=3 mice at the 3-month time point and N=30 tumors analyzed from N=3 mice at the 6-month time point. Percentages are indicated.



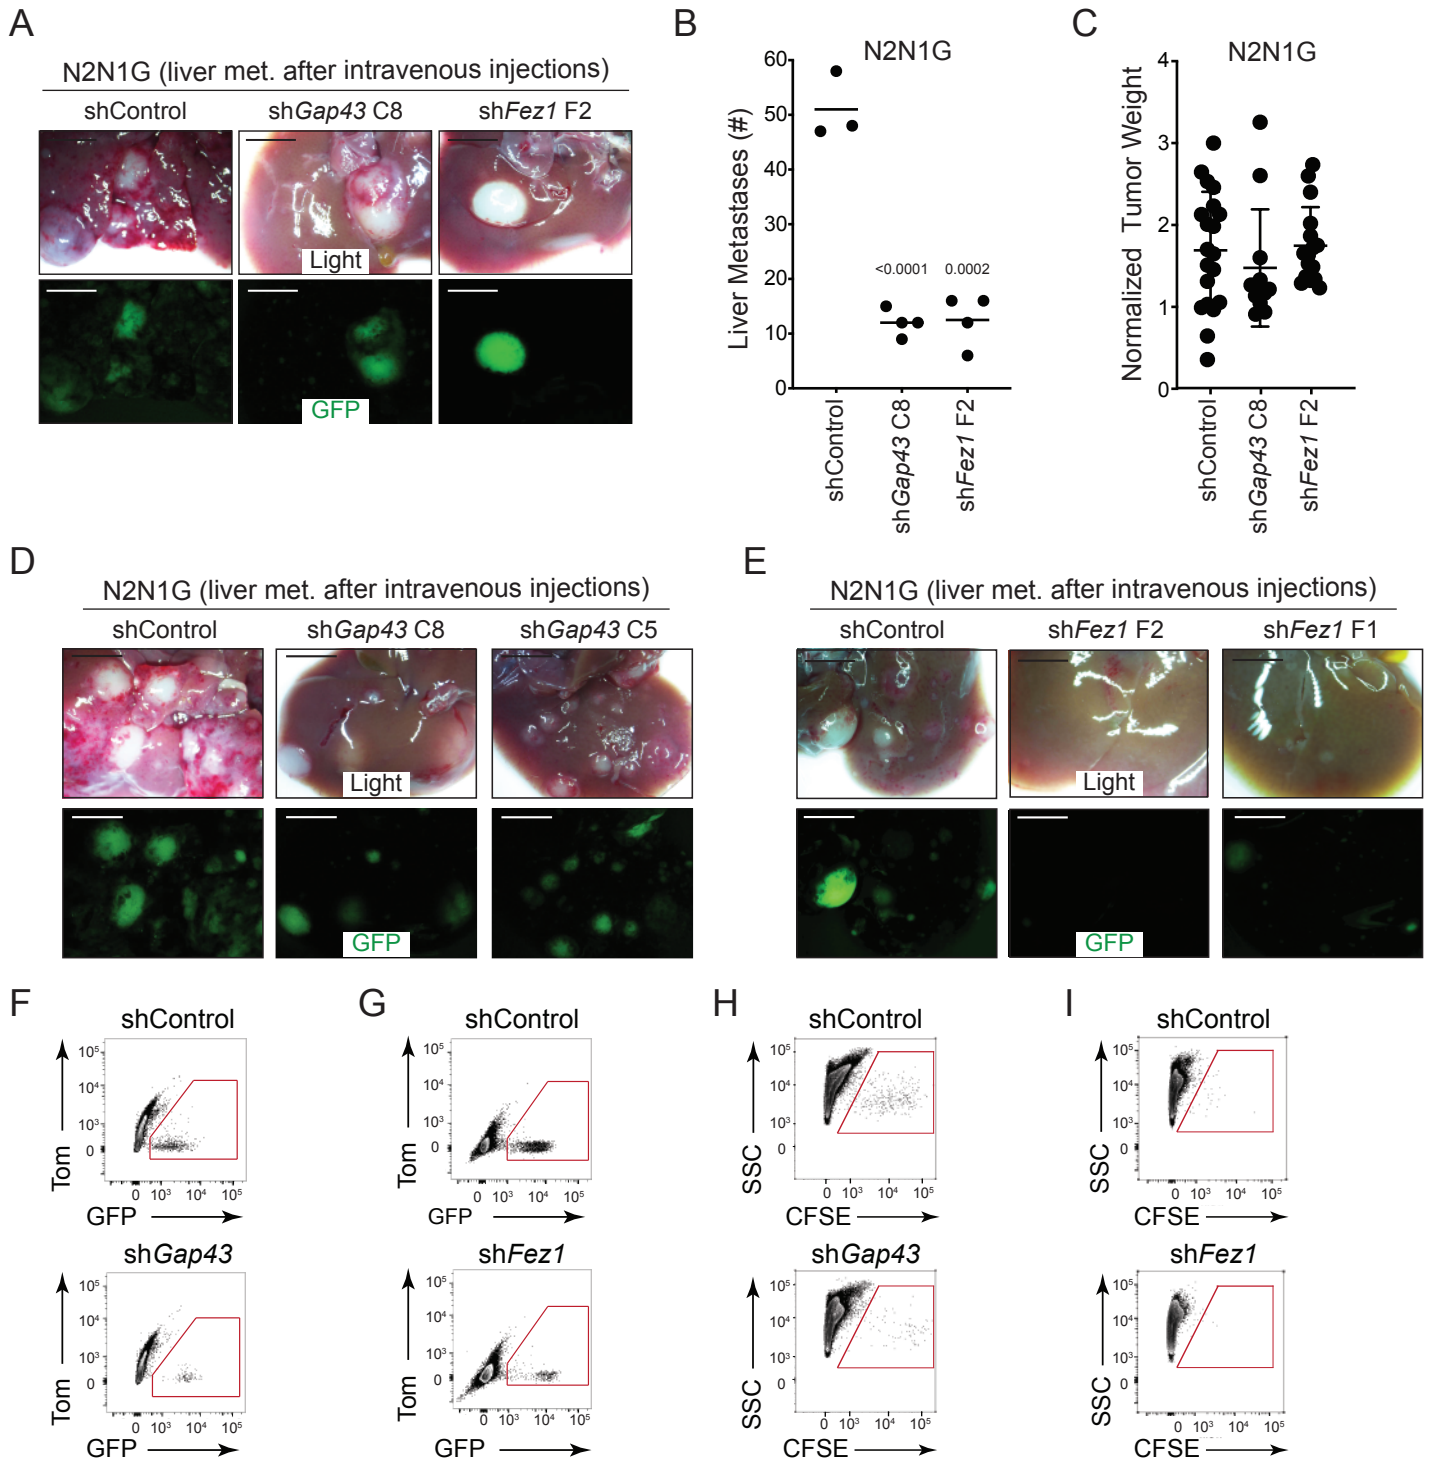

**Figure S7 (related to Figure 4): Reduced formation of metastasis upon knock-down of GAP43 and FEZ1 in SCLC cells**

A. Representative live and epifluorescence images (GFP, green) of liver section of mice 4 weeks after intravenous injection of GFP-positive N2N1G mSCLC cells, with control knock-down or knock-down of *Gap43* or *Fez1*. Scale bars, 5 mm.

B. Quantification of (A). The bar is the mean, unpaired t-test.

C. Quantification of tumor weight after subcutaneous injection of control and knock-down N2N1G cells. Values are not statistically significant by t-test.

D-E. Representative bright light and epifluorescence images (GFP, green) of liver section of mice 4 weeks after intravenous injection of GFP-positive N2N1G mSCLC cells, with control knock-down or knock-down of *Gap43* or *Fez1*. Scale bars, 5 mm.

F-G. Representative flow cytometry quantification of GFP-positive N2N1G cells in the liver 2 days after intravenous injection.

H-I. Representative flow cytometry quantification of CFSE-labeled 16T cells in the liver 2 days after intravenous injection.
